# Supplementary material for: Detecting Potentially Adaptive Mutations from the Parallel and Fixed Patterns in SARS-CoV-2 Evolution
Source: MDPI journal article supplement (doi:10.3390/v14051087), 2022-05-18
Supplement: s1 [file s1]

# Supplementary Information for

## Detecting potentially adaptive mutations from the parallel and fixed patterns in SARS-CoV-2 evolution

Cheng-Yang Ji, Na Han, Ye-Xiao Cheng, Jingzhe Shang, Shenghui Weng, Rong Yang, Hang-Yu Zhou and Aiping Wu

Corresponding to: Aiping Wu ([wap@ism.cams.cn](mailto:wap@ism.cams.cn)) and Hang-Yu Zhou ([zhy@ism.cams.cn](mailto:zhy@ism.cams.cn))

### **This PDF file includes:**

Figs. S1, S2  
Captions for Table S1

### **Other Supplementary Materials for this manuscript include the following:**

Table S1

**Table S1 Detected sites that have experienced paraFix mutations.**

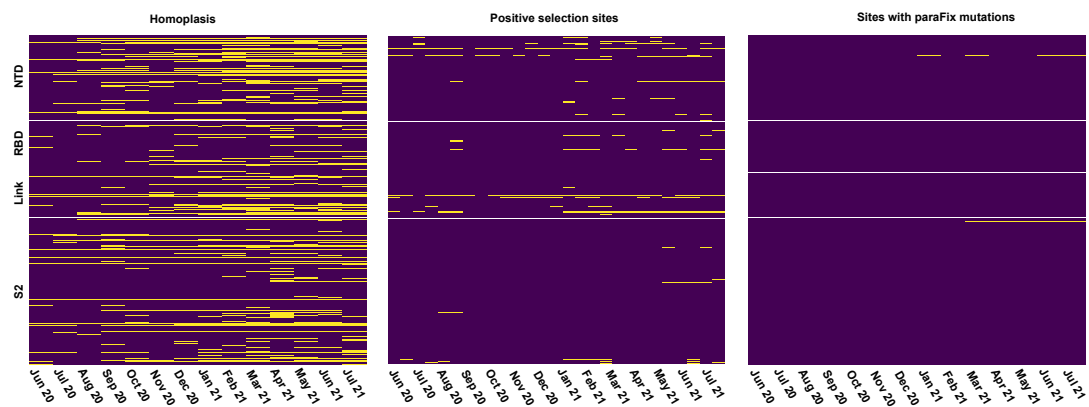

**Fig. S1** The detected homoplasia (left), positive selection sites (middle) and sites experienced paraFix (right) in S protein.

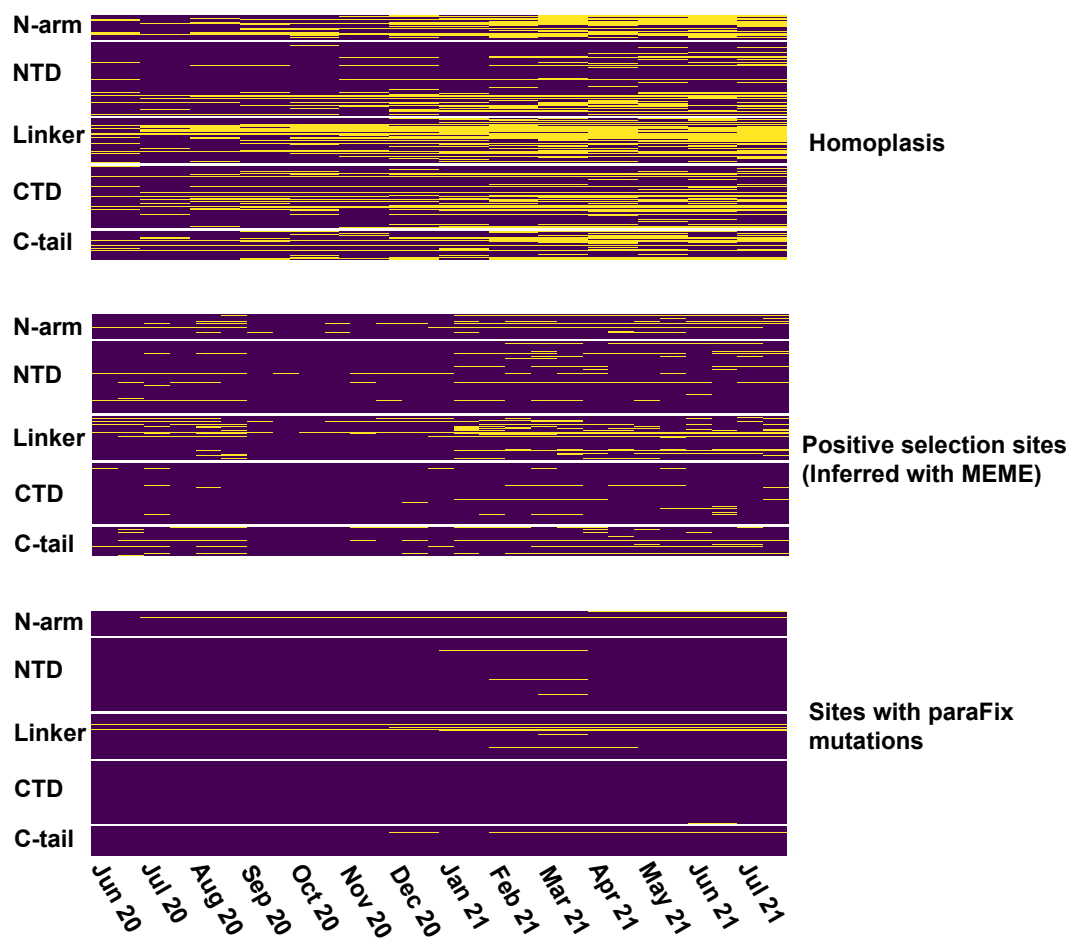

Fig.S2 The distribution of detected adaptative related sites in N protein.
