# Supplementary material for: Detecting Potentially Adaptive Mutations from the Parallel and Fixed Patterns in SARS-CoV-2 Evolution
Source: Viruses. 2022 May 18;14(5):1087. doi: 10.3390/v14051087 (PMC9147038; doi:10.3390/v14051087)
Supplement: Supplementary file 1 [file viruses-14-01087-s001.zip]

Archive with 4 entries (4 files):
- Supporting_Information_viruses_revise.pdf
- __MACOSX/._Supporting_Information_viruses_revise.pdf
- TableS1.xlsx
- __MACOSX/._TableS1.xlsx
