# Supplementary material for: Detecting Potentially Adaptive Mutations from the Parallel and Fixed Patterns in SARS-CoV-2 Evolution
Source: Viruses. 2022 May 18;14(5):1087. doi: 10.3390/v14051087 (PMC9147038; doi:10.3390/v14051087)
Supplement: Supplementary file 1 [file viruses-14-01087-s001.zip › TableS1.xlsx]

## Sheet: Table S1
site	fixedMut	paraMut	paraFixMut	type	date	gene	product	aaPos	aa
4	L4F			fixation	2021-05-17	ORF1ab	NSP1	4	L
4	L4F			fixation	2021-06-15	ORF1ab	NSP1	4	L
4	L4F			fixation	2021-06-02	ORF1ab	NSP1	4	L
24		R24C, R24S		parallel	2021-03-01	ORF1ab	NSP1	24	R
24		R24C		parallel	2020-11-16	ORF1ab	NSP1	24	R
24		R24C, R24S		parallel	2020-11-02	ORF1ab	NSP1	24	R
24		R24S, R24C		parallel	2021-03-16	ORF1ab	NSP1	24	R
24		R24C, R24S		parallel	2021-04-02	ORF1ab	NSP1	24	R
24		R24C		parallel	2021-01-15	ORF1ab	NSP1	24	R
24		R24C		parallel	2020-12-15	ORF1ab	NSP1	24	R
24		R24S, R24C		parallel	2021-02-01	ORF1ab	NSP1	24	R
24		R24C		parallel	2020-12-01	ORF1ab	NSP1	24	R
57		E57K, E57A		parallel	2021-04-02	ORF1ab	NSP1	57	E
86		V86F		parallel	2021-06-02	ORF1ab	NSP1	86	V
144	D144A			fixation	2020-12-01	ORF1ab	NSP1	144	D
144	D144A			fixation	2020-11-16	ORF1ab	NSP1	144	D
147	D147N			fixation	2020-10-15	ORF1ab	NSP1	147	D
147		D147N, D147G		parallel	2020-11-16	ORF1ab	NSP1	147	D
190	F190L			fixation	2020-06-01	ORF1ab	NSP2	10	F
203		D203N, D203Y		parallel	2021-06-02	ORF1ab	NSP2	23	D
203		D203N		parallel	2021-02-01	ORF1ab	NSP2	23	D
203		D203N, D203Y		parallel	2021-02-15	ORF1ab	NSP2	23	D
203		D203N, D203Y		parallel	2021-03-01	ORF1ab	NSP2	23	D
203		D203Y, D203N		parallel	2021-07-01	ORF1ab	NSP2	23	D
203		D203N, D203Y		parallel	2021-01-15	ORF1ab	NSP2	23	D
203		D203N		parallel	2021-04-15	ORF1ab	NSP2	23	D
203		D203N, D203Y		parallel	2021-03-16	ORF1ab	NSP2	23	D
203		D203N		parallel	2021-06-15	ORF1ab	NSP2	23	D
203		D203N		parallel	2021-04-02	ORF1ab	NSP2	23	D
207	R207C			fixation	2020-09-15	ORF1ab	NSP2	27	R
207	R207C			fixation	2020-07-31	ORF1ab	NSP2	27	R
207		R207C, R207L		parallel	2021-04-02	ORF1ab	NSP2	27	R
207	R207C			fixation	2020-09-01	ORF1ab	NSP2	27	R
207	R207C			fixation	2020-07-01	ORF1ab	NSP2	27	R
207		R207C		parallel	2021-07-01	ORF1ab	NSP2	27	R
207		R207C		parallel	2021-05-17	ORF1ab	NSP2	27	R
207		R207C, R207L		parallel	2021-06-15	ORF1ab	NSP2	27	R
207	R207C			fixation	2020-07-15	ORF1ab	NSP2	27	R
207	R207C			fixation	2020-10-01	ORF1ab	NSP2	27	R
207	R207C			fixation	2020-06-15	ORF1ab	NSP2	27	R
207	R207C			fixation	2020-08-14	ORF1ab	NSP2	27	R
207	R207C			fixation	2020-06-01	ORF1ab	NSP2	27	R
207	R207C			fixation	2020-10-15	ORF1ab	NSP2	27	R
224		T224I		parallel	2021-06-02	ORF1ab	NSP2	44	T
224		T224I		parallel	2021-07-01	ORF1ab	NSP2	44	T
224		T224I		parallel	2021-04-15	ORF1ab	NSP2	44	T
224		T224I		parallel	2021-04-30	ORF1ab	NSP2	44	T
224		T224I		parallel	2021-05-17	ORF1ab	NSP2	44	T
224		T224N, T224I		parallel	2021-01-15	ORF1ab	NSP2	44	T
232		R232H, R232S		parallel	2021-04-02	ORF1ab	NSP2	52	R
265	T265I			fixation	2020-11-02	ORF1ab	NSP2	85	T
265	T265I	T265I, I265T	T265I	paraFix	2021-06-15	ORF1ab	NSP2	85	T
265	T265I, I265T	I265T, T265I	I265T, T265I	paraFix	2021-04-15	ORF1ab	NSP2	85	T
265	T265I			fixation	2020-10-15	ORF1ab	NSP2	85	T
265	T265I	T265I	T265I	paraFix	2020-09-15	ORF1ab	NSP2	85	T
265	T265I	T265I, I265T	T265I	paraFix	2020-08-14	ORF1ab	NSP2	85	T
265	T265I	I265T, T265I	T265I	paraFix	2020-12-01	ORF1ab	NSP2	85	T
265	T265I			fixation	2021-03-16	ORF1ab	NSP2	85	T
265	T265I	T265I, I265T, T265N	T265I	paraFix	2020-11-16	ORF1ab	NSP2	85	T
265	T265I	T265I, I265T	T265I	paraFix	2020-06-01	ORF1ab	NSP2	85	T
265	T265I	I265T, T265I	T265I	paraFix	2020-06-15	ORF1ab	NSP2	85	T
265	T265I	T265I, I265T	T265I	paraFix	2021-03-01	ORF1ab	NSP2	85	T
265	T265I	T265I, I265T	T265I	paraFix	2021-01-15	ORF1ab	NSP2	85	T
265	T265I			fixation	2021-07-01	ORF1ab	NSP2	85	T
265	T265I	I265T, T265I	T265I	paraFix	2020-07-01	ORF1ab	NSP2	85	T
265	T265I	I265T		paraFix	2021-04-30	ORF1ab	NSP2	85	T
265	T265I	T265I, I265T	T265I	paraFix	2020-10-01	ORF1ab	NSP2	85	T
265	T265I	T265I	T265I	paraFix	2020-09-01	ORF1ab	NSP2	85	T
265	T265I	I265T, T265I	T265I	paraFix	2020-07-15	ORF1ab	NSP2	85	T
265	T265I	T265I, I265M, I265T	T265I	paraFix	2021-06-02	ORF1ab	NSP2	85	T
265	T265I			fixation	2021-01-01	ORF1ab	NSP2	85	T
265	T265I	T265I, I265T	T265I	paraFix	2020-07-31	ORF1ab	NSP2	85	T
265	T265I			fixation	2021-05-17	ORF1ab	NSP2	85	T
265	T265I			fixation	2021-02-01	ORF1ab	NSP2	85	T
265	T265I			fixation	2021-04-02	ORF1ab	NSP2	85	T
265	T265I	T265I, I265T	T265I	paraFix	2021-02-15	ORF1ab	NSP2	85	T
265	T265I	T265I, I265T	T265I	paraFix	2020-12-15	ORF1ab	NSP2	85	T
290		K290N		parallel	2020-12-15	ORF1ab	NSP2	110	K
300	I300F			fixation	2021-04-15	ORF1ab	NSP2	120	I
300	I300F			fixation	2020-09-01	ORF1ab	NSP2	120	I
300	I300F	I300F	I300F	paraFix	2021-02-01	ORF1ab	NSP2	120	I
300	I300F	I300F, F300I	I300F	paraFix	2021-02-15	ORF1ab	NSP2	120	I
300	I300F	I300F	I300F	paraFix	2021-04-30	ORF1ab	NSP2	120	I
300	I300F	I300F	I300F	paraFix	2020-12-15	ORF1ab	NSP2	120	I
300	I300F	I300F	I300F	paraFix	2020-12-01	ORF1ab	NSP2	120	I
300	I300F			fixation	2021-06-02	ORF1ab	NSP2	120	I
300	I300F			fixation	2021-03-01	ORF1ab	NSP2	120	I
300	I300F	I300F	I300F	paraFix	2021-04-02	ORF1ab	NSP2	120	I
300	I300F			fixation	2020-10-01	ORF1ab	NSP2	120	I
300	I300F	I300F	I300F	paraFix	2020-07-31	ORF1ab	NSP2	120	I
300	I300F			fixation	2020-10-15	ORF1ab	NSP2	120	I
300	I300F			fixation	2020-07-15	ORF1ab	NSP2	120	I
300	I300F, F300I			fixation	2020-06-15	ORF1ab	NSP2	120	I
300	I300F			fixation	2020-07-01	ORF1ab	NSP2	120	I
300	I300F	I300F	I300F	paraFix	2020-08-14	ORF1ab	NSP2	120	I
300	I300F	I300F, F300I	I300F	paraFix	2020-11-16	ORF1ab	NSP2	120	I
300	I300F			fixation	2021-05-17	ORF1ab	NSP2	120	I
300	I300F			fixation	2020-09-15	ORF1ab	NSP2	120	I
300	I300F			fixation	2020-11-02	ORF1ab	NSP2	120	I
300	I300F			fixation	2021-06-15	ORF1ab	NSP2	120	I
300	I300F	I300F, F300I	I300F	paraFix	2021-01-01	ORF1ab	NSP2	120	I
300	I300F			fixation	2021-03-16	ORF1ab	NSP2	120	I
300	I300F	I300F	I300F	paraFix	2021-01-15	ORF1ab	NSP2	120	I
309		P309L, P309S		parallel	2020-12-15	ORF1ab	NSP2	129	P
309	P309L	P309S, P309L	P309L	paraFix	2021-06-02	ORF1ab	NSP2	129	P
309		P309S, P309L		parallel	2021-04-15	ORF1ab	NSP2	129	P
309	P309L			fixation	2021-06-15	ORF1ab	NSP2	129	P
309		P309S, P309L, P309Q		parallel	2021-03-16	ORF1ab	NSP2	129	P
309	P309L	P309L, P309S, P309T	P309L	paraFix	2021-07-01	ORF1ab	NSP2	129	P
309		P309S, P309L		parallel	2021-04-30	ORF1ab	NSP2	129	P
309		P309S, P309L		parallel	2021-04-02	ORF1ab	NSP2	129	P
309		P309S, P309L		parallel	2020-11-16	ORF1ab	NSP2	129	P
309		P309L, P309S		parallel	2020-07-15	ORF1ab	NSP2	129	P
313	N313D			fixation	2020-09-01	ORF1ab	NSP2	133	N
346		T346I		parallel	2021-02-01	ORF1ab	NSP2	166	T
346	T346I			fixation	2021-04-30	ORF1ab	NSP2	166	T
346		T346I		parallel	2021-01-15	ORF1ab	NSP2	166	T
350		T350I, T350A, T350N		parallel	2021-04-02	ORF1ab	NSP2	170	T
378	V378I, I378V			fixation	2021-03-01	ORF1ab	NSP2	198	V
378	V378I			fixation	2020-09-01	ORF1ab	NSP2	198	V
378	V378I			fixation	2020-06-15	ORF1ab	NSP2	198	V
378	V378I, I378V			fixation	2020-11-16	ORF1ab	NSP2	198	V
378	V378I, I378V			fixation	2021-02-01	ORF1ab	NSP2	198	V
378	V378I			fixation	2020-09-15	ORF1ab	NSP2	198	V
378	V378I			fixation	2020-07-15	ORF1ab	NSP2	198	V
378	V378I			fixation	2020-08-14	ORF1ab	NSP2	198	V
378	V378I			fixation	2020-07-31	ORF1ab	NSP2	198	V
378	V378I			fixation	2020-10-15	ORF1ab	NSP2	198	V
378	V378I			fixation	2021-02-15	ORF1ab	NSP2	198	V
378	V378I			fixation	2020-07-01	ORF1ab	NSP2	198	V
378	V378I			fixation	2020-11-02	ORF1ab	NSP2	198	V
378	V378I			fixation	2020-06-01	ORF1ab	NSP2	198	V
378	V378I, I378V			fixation	2021-01-01	ORF1ab	NSP2	198	V
378	V378I, I378V			fixation	2021-06-15	ORF1ab	NSP2	198	V
378	V378I			fixation	2020-10-01	ORF1ab	NSP2	198	V
378	V378I, I378V			fixation	2021-01-15	ORF1ab	NSP2	198	V
378	V378I, I378V			fixation	2021-04-30	ORF1ab	NSP2	198	V
380		P380L, P380S		parallel	2021-07-01	ORF1ab	NSP2	200	P
388		H388Y		parallel	2020-12-01	ORF1ab	NSP2	208	H
388		H388Y		parallel	2020-12-15	ORF1ab	NSP2	208	H
388		H388Y		parallel	2021-01-01	ORF1ab	NSP2	208	H
388		H388Y		parallel	2020-11-16	ORF1ab	NSP2	208	H
392	G392D			fixation	2020-07-15	ORF1ab	NSP2	212	G
392		G392D, G392C		parallel	2020-07-31	ORF1ab	NSP2	212	G
392	G392D, D392G			fixation	2020-06-15	ORF1ab	NSP2	212	G
392	G392D	G392C, G392D	G392D	paraFix	2020-08-14	ORF1ab	NSP2	212	G
392	G392D			fixation	2020-06-01	ORF1ab	NSP2	212	G
392	G392D			fixation	2020-07-01	ORF1ab	NSP2	212	G
392	G392D	G392D, G392C	G392D	paraFix	2020-09-01	ORF1ab	NSP2	212	G
392	G392D			fixation	2020-09-15	ORF1ab	NSP2	212	G
398		R398C		parallel	2020-12-15	ORF1ab	NSP2	218	R
398		R398C		parallel	2020-12-01	ORF1ab	NSP2	218	R
400	G400D			fixation	2020-09-01	ORF1ab	NSP2	220	G
400		G400D, G400S		parallel	2020-11-16	ORF1ab	NSP2	220	G
400		G400S, G400C, G400D		parallel	2021-04-30	ORF1ab	NSP2	220	G
405		A405D		parallel	2020-12-01	ORF1ab	NSP2	225	A
417		H417Y		parallel	2021-02-01	ORF1ab	NSP2	237	H
417		H417Y, H417Q		parallel	2021-03-01	ORF1ab	NSP2	237	H
417		H417Y		parallel	2021-02-15	ORF1ab	NSP2	237	H
433		C433R, C433F, C433Y		parallel	2020-12-15	ORF1ab	NSP2	253	C
443		S443F		parallel	2021-02-01	ORF1ab	NSP2	263	S
443		S443F		parallel	2020-11-02	ORF1ab	NSP2	263	S
451		L451F		parallel	2021-05-17	ORF1ab	NSP2	271	L
454		L454F, L454R		parallel	2020-11-16	ORF1ab	NSP2	274	L
454		L454F, L454R		parallel	2020-12-01	ORF1ab	NSP2	274	L
460	N460Y			fixation	2021-07-01	ORF1ab	NSP2	280	N
460	N460Y			fixation	2021-04-15	ORF1ab	NSP2	280	N
460	N460Y			fixation	2021-04-30	ORF1ab	NSP2	280	N
460	N460Y			fixation	2021-04-02	ORF1ab	NSP2	280	N
460	N460Y			fixation	2021-06-15	ORF1ab	NSP2	280	N
460	N460Y			fixation	2021-05-17	ORF1ab	NSP2	280	N
460	N460Y			fixation	2021-06-02	ORF1ab	NSP2	280	N
486		A486V		parallel	2021-01-01	ORF1ab	NSP2	306	A
486		A486V		parallel	2021-05-17	ORF1ab	NSP2	306	A
486		A486V		parallel	2021-02-15	ORF1ab	NSP2	306	A
486		A486V		parallel	2021-02-01	ORF1ab	NSP2	306	A
486		A486S, A486V		parallel	2021-04-02	ORF1ab	NSP2	306	A
486		A486V		parallel	2021-03-16	ORF1ab	NSP2	306	A
486		A486V		parallel	2021-06-02	ORF1ab	NSP2	306	A
498		A498V		parallel	2020-10-01	ORF1ab	NSP2	318	A
498		A498V		parallel	2020-12-01	ORF1ab	NSP2	318	A
498		A498V		parallel	2020-12-15	ORF1ab	NSP2	318	A
498		A498V		parallel	2020-11-16	ORF1ab	NSP2	318	A
516	A516V			fixation	2020-07-01	ORF1ab	NSP2	336	A
519		G519S		parallel	2021-05-17	ORF1ab	NSP2	339	G
519		G519S		parallel	2021-03-16	ORF1ab	NSP2	339	G
519		G519D, G519S		parallel	2021-04-30	ORF1ab	NSP2	339	G
519		G519D, G519S, G519C		parallel	2020-11-16	ORF1ab	NSP2	339	G
519		G519S, G519D		parallel	2021-06-02	ORF1ab	NSP2	339	G
519		G519S, G519D		parallel	2021-04-15	ORF1ab	NSP2	339	G
519		G519C, G519S, G519D		parallel	2020-12-01	ORF1ab	NSP2	339	G
519		G519S, G519C, G519D		parallel	2021-03-01	ORF1ab	NSP2	339	G
526		Q526H		parallel	2020-12-01	ORF1ab	NSP2	346	Q
561	V561A			fixation	2020-12-15	ORF1ab	NSP2	381	V
561	V561A	V561F, V561A, A561V	V561A	paraFix	2021-04-02	ORF1ab	NSP2	381	V
561	V561A			fixation	2020-12-01	ORF1ab	NSP2	381	V
561		V561F, V561A, V561I		parallel	2021-02-01	ORF1ab	NSP2	381	V
561	V561A	V561F, V561A	V561A	paraFix	2021-01-15	ORF1ab	NSP2	381	V
561	V561A			fixation	2021-03-01	ORF1ab	NSP2	381	V
561	V561A	V561F, V561A, A561V, V561I	V561A	paraFix	2021-03-16	ORF1ab	NSP2	381	V
561		V561F, V561A		parallel	2021-01-01	ORF1ab	NSP2	381	V
561	V561A			fixation	2021-04-30	ORF1ab	NSP2	381	V
561	V561A			fixation	2020-11-16	ORF1ab	NSP2	381	V
561		V561F, V561I, V561A		parallel	2021-06-02	ORF1ab	NSP2	381	V
610		S610L		parallel	2021-01-01	ORF1ab	NSP2	430	S
681		L681F		parallel	2021-02-01	ORF1ab	NSP2	501	L
690		A690V		parallel	2021-05-17	ORF1ab	NSP2	510	A
690	A690V			fixation	2021-06-15	ORF1ab	NSP2	510	A
690		A690V		parallel	2021-04-30	ORF1ab	NSP2	510	A
708		T708I		parallel	2021-02-01	ORF1ab	NSP2	528	T
730	L730F			fixation	2021-06-02	ORF1ab	NSP2	550	L
730		L730F		parallel	2021-04-02	ORF1ab	NSP2	550	L
730	L730F			fixation	2021-06-15	ORF1ab	NSP2	550	L
730	L730F, F730L	F730L, L730F	F730L, L730F	paraFix	2021-05-17	ORF1ab	NSP2	550	L
730	L730F, F730L	L730F, F730L	L730F, F730L	paraFix	2021-04-15	ORF1ab	NSP2	550	L
730	L730F	L730F, L730I	L730F	paraFix	2021-04-30	ORF1ab	NSP2	550	L
731		M731I, M731L		parallel	2021-02-15	ORF1ab	NSP2	551	M
737	K737R			fixation	2021-01-01	ORF1ab	NSP2	557	K
737	K737R			fixation	2021-01-15	ORF1ab	NSP2	557	K
739	I739V			fixation	2020-11-02	ORF1ab	NSP2	559	I
739	I739V			fixation	2020-10-15	ORF1ab	NSP2	559	I
739	I739V			fixation	2020-10-01	ORF1ab	NSP2	559	I
739	I739V			fixation	2020-07-31	ORF1ab	NSP2	559	I
739	I739V			fixation	2020-07-15	ORF1ab	NSP2	559	I
739	I739V			fixation	2020-09-01	ORF1ab	NSP2	559	I
739	I739V			fixation	2020-06-15	ORF1ab	NSP2	559	I
739	I739V			fixation	2020-08-14	ORF1ab	NSP2	559	I
739	I739V			fixation	2020-07-01	ORF1ab	NSP2	559	I
739	I739V			fixation	2020-09-15	ORF1ab	NSP2	559	I
739	I739V			fixation	2020-06-01	ORF1ab	NSP2	559	I
765	P765S			fixation	2020-10-01	ORF1ab	NSP2	585	P
765	P765S			fixation	2020-07-01	ORF1ab	NSP2	585	P
765	P765S			fixation	2020-11-02	ORF1ab	NSP2	585	P
765	P765S			fixation	2020-08-14	ORF1ab	NSP2	585	P
765	P765S			fixation	2020-09-01	ORF1ab	NSP2	585	P
765	P765S			fixation	2020-06-15	ORF1ab	NSP2	585	P
765	P765S			fixation	2020-06-01	ORF1ab	NSP2	585	P
765	P765S			fixation	2020-07-15	ORF1ab	NSP2	585	P
765	P765S			fixation	2020-09-15	ORF1ab	NSP2	585	P
765	P765S			fixation	2020-07-31	ORF1ab	NSP2	585	P
765	P765S			fixation	2020-10-15	ORF1ab	NSP2	585	P
776	A776V			fixation	2021-06-15	ORF1ab	NSP2	596	A
804		P804L, P804S		parallel	2021-04-02	ORF1ab	NSP2	624	P
804	P804L			fixation	2021-06-15	ORF1ab	NSP2	624	P
814		T814I		parallel	2020-11-16	ORF1ab	NSP2	634	T
814		T814I		parallel	2020-12-01	ORF1ab	NSP2	634	T
859		A859V		parallel	2021-07-01	ORF1ab	NSP3	41	A
876	A876T			fixation	2020-07-15	ORF1ab	NSP3	58	A
876	A876T, T876A			fixation	2020-06-15	ORF1ab	NSP3	58	A
876	A876T			fixation	2020-06-01	ORF1ab	NSP3	58	A
876	A876T			fixation	2020-09-01	ORF1ab	NSP3	58	A
876	A876T			fixation	2020-07-01	ORF1ab	NSP3	58	A
876	A876T			fixation	2020-08-14	ORF1ab	NSP3	58	A
876	A876T			fixation	2020-09-15	ORF1ab	NSP3	58	A
882		T882I		parallel	2020-11-16	ORF1ab	NSP3	64	T
882		T882I		parallel	2020-12-15	ORF1ab	NSP3	64	T
892		P892L, P892S		parallel	2020-11-16	ORF1ab	NSP3	74	P
903	A903V			fixation	2020-11-16	ORF1ab	NSP3	85	A
903		A903V		parallel	2021-04-02	ORF1ab	NSP3	85	A
903		A903V		parallel	2021-02-01	ORF1ab	NSP3	85	A
903		A903V		parallel	2021-04-15	ORF1ab	NSP3	85	A
944	S944L	S944L, S944P	S944L	paraFix	2021-06-02	ORF1ab	NSP3	126	S
944		S944L		parallel	2020-11-02	ORF1ab	NSP3	126	S
944		S944L		parallel	2021-04-15	ORF1ab	NSP3	126	S
944		S944L, S944P		parallel	2021-01-15	ORF1ab	NSP3	126	S
944		S944L		parallel	2020-10-15	ORF1ab	NSP3	126	S
944	S944L	S944L	S944L	paraFix	2021-06-15	ORF1ab	NSP3	126	S
944		S944L		parallel	2021-02-15	ORF1ab	NSP3	126	S
944	S944L			fixation	2021-07-01	ORF1ab	NSP3	126	S
944		S944L, S944P		parallel	2021-03-01	ORF1ab	NSP3	126	S
944		S944L		parallel	2021-04-02	ORF1ab	NSP3	126	S
944		S944L, S944P		parallel	2021-03-16	ORF1ab	NSP3	126	S
944		S944L		parallel	2021-05-17	ORF1ab	NSP3	126	S
944		S944L		parallel	2021-04-30	ORF1ab	NSP3	126	S
951		T951I		parallel	2021-03-16	ORF1ab	NSP3	133	T
951		T951I		parallel	2021-04-30	ORF1ab	NSP3	133	T
951		T951I		parallel	2021-04-15	ORF1ab	NSP3	133	T
951		T951I		parallel	2020-12-01	ORF1ab	NSP3	133	T
959	P959S			fixation	2021-06-15	ORF1ab	NSP3	141	P
959	P959S			fixation	2021-04-15	ORF1ab	NSP3	141	P
959	P959S			fixation	2021-07-01	ORF1ab	NSP3	141	P
959	P959S			fixation	2021-06-02	ORF1ab	NSP3	141	P
959	P959S			fixation	2021-03-16	ORF1ab	NSP3	141	P
959	P959S			fixation	2021-05-17	ORF1ab	NSP3	141	P
959	P959S			fixation	2021-04-30	ORF1ab	NSP3	141	P
959		P959S		parallel	2021-02-15	ORF1ab	NSP3	141	P
959	P959S			fixation	2021-04-02	ORF1ab	NSP3	141	P
967		A967V		parallel	2021-06-15	ORF1ab	NSP3	149	A
967		A967V		parallel	2021-04-15	ORF1ab	NSP3	149	A
971		P971L, P971S, P971T		parallel	2021-06-02	ORF1ab	NSP3	153	P
971		P971L		parallel	2021-04-30	ORF1ab	NSP3	153	P
971		P971L, P971S		parallel	2021-02-01	ORF1ab	NSP3	153	P
971		P971L, P971S		parallel	2021-04-15	ORF1ab	NSP3	153	P
971		P971L		parallel	2020-11-16	ORF1ab	NSP3	153	P
971		P971H, P971L		parallel	2020-07-15	ORF1ab	NSP3	153	P
971		P971L		parallel	2021-03-01	ORF1ab	NSP3	153	P
971		P971L, P971S		parallel	2020-10-01	ORF1ab	NSP3	153	P
971		P971H, P971L		parallel	2020-07-01	ORF1ab	NSP3	153	P
971		P971L		parallel	2020-12-15	ORF1ab	NSP3	153	P
989	G989V			fixation	2021-03-01	ORF1ab	NSP3	171	G
989	G989V			fixation	2021-02-15	ORF1ab	NSP3	171	G
989	G989V			fixation	2021-01-15	ORF1ab	NSP3	171	G
993		G993D, G993S		parallel	2021-02-15	ORF1ab	NSP3	175	G
993		G993D, G993S		parallel	2021-01-15	ORF1ab	NSP3	175	G
998		Q998H		parallel	2021-03-01	ORF1ab	NSP3	180	Q
998		Q998H		parallel	2021-07-01	ORF1ab	NSP3	180	Q
998		Q998H		parallel	2021-05-17	ORF1ab	NSP3	180	Q
1001	T1001I	T1001I, I1001T	T1001I	paraFix	2021-04-02	ORF1ab	NSP3	183	T
1001	T1001I	T1001I, I1001T	T1001I	paraFix	2021-06-02	ORF1ab	NSP3	183	T
1001	T1001I	T1001I	T1001I	paraFix	2021-04-15	ORF1ab	NSP3	183	T
1001	T1001I	T1001I	T1001I	paraFix	2021-02-15	ORF1ab	NSP3	183	T
1001	T1001I	T1001I, I1001T	T1001I	paraFix	2021-05-17	ORF1ab	NSP3	183	T
1001	T1001I	T1001I	T1001I	paraFix	2021-03-01	ORF1ab	NSP3	183	T
1001	T1001I	T1001I	T1001I	paraFix	2021-02-01	ORF1ab	NSP3	183	T
1001	T1001I	T1001I, I1001T	T1001I	paraFix	2021-06-15	ORF1ab	NSP3	183	T
1001	T1001I	T1001I	T1001I	paraFix	2021-01-15	ORF1ab	NSP3	183	T
1001	T1001I	T1001I, I1001T	T1001I	paraFix	2021-07-01	ORF1ab	NSP3	183	T
1001	T1001I	T1001I, I1001T	T1001I	paraFix	2021-03-16	ORF1ab	NSP3	183	T
1001	T1001I			fixation	2021-04-30	ORF1ab	NSP3	183	T
1013	E1013K			fixation	2021-04-15	ORF1ab	NSP3	195	E
1013	E1013K			fixation	2021-04-30	ORF1ab	NSP3	195	E
1013		E1013K, E1013D		parallel	2021-03-01	ORF1ab	NSP3	195	E
1036	D1036E			fixation	2020-09-01	ORF1ab	NSP3	218	D
1036	D1036E			fixation	2020-09-15	ORF1ab	NSP3	218	D
1036	D1036E, E1036D			fixation	2020-10-15	ORF1ab	NSP3	218	D
1036		D1036E		parallel	2020-12-01	ORF1ab	NSP3	218	D
1036	D1036E			fixation	2021-01-15	ORF1ab	NSP3	218	D
1036	D1036E			fixation	2020-10-01	ORF1ab	NSP3	218	D
1036	D1036E			fixation	2020-07-01	ORF1ab	NSP3	218	D
1036	D1036E			fixation	2020-11-02	ORF1ab	NSP3	218	D
1036		D1036E		parallel	2021-03-01	ORF1ab	NSP3	218	D
1036	D1036E			fixation	2020-08-14	ORF1ab	NSP3	218	D
1036	D1036E			fixation	2020-07-31	ORF1ab	NSP3	218	D
1049		A1049V		parallel	2020-11-16	ORF1ab	NSP3	231	A
1049		A1049V		parallel	2021-04-15	ORF1ab	NSP3	231	A
1055		T1055A, T1055I		parallel	2021-04-30	ORF1ab	NSP3	237	T
1055		T1055A, T1055I		parallel	2021-06-02	ORF1ab	NSP3	237	T
1056	V1056L			fixation	2021-04-30	ORF1ab	NSP3	238	V
1071	V1071A			fixation	2021-06-15	ORF1ab	NSP3	253	V
1071	V1071A			fixation	2021-04-30	ORF1ab	NSP3	253	V
1073		G1073R, G1073E		parallel	2021-02-01	ORF1ab	NSP3	255	G
1073		G1073E, G1073R		parallel	2021-02-15	ORF1ab	NSP3	255	G
1073		G1073R, G1073E		parallel	2021-03-16	ORF1ab	NSP3	255	G
1108		H1108Y		parallel	2021-02-01	ORF1ab	NSP3	290	H
1113	H1113Y			fixation	2021-02-15	ORF1ab	NSP3	295	H
1113	H1113Y			fixation	2020-12-01	ORF1ab	NSP3	295	H
1113	H1113Y	H1113Y	H1113Y	paraFix	2021-01-15	ORF1ab	NSP3	295	H
1113	H1113Y			fixation	2020-12-15	ORF1ab	NSP3	295	H
1113	H1113Y			fixation	2020-11-16	ORF1ab	NSP3	295	H
1113	H1113Y			fixation	2021-03-01	ORF1ab	NSP3	295	H
1113	H1113Y			fixation	2021-02-01	ORF1ab	NSP3	295	H
1125		G1125C		parallel	2021-04-15	ORF1ab	NSP3	307	G
1143		V1143F		parallel	2021-04-30	ORF1ab	NSP3	325	V
1158		P1158S, P1158L		parallel	2020-12-15	ORF1ab	NSP3	340	P
1158		P1158S, P1158L		parallel	2020-12-01	ORF1ab	NSP3	340	P
1158		P1158S, P1158L		parallel	2021-03-16	ORF1ab	NSP3	340	P
1158		P1158S, P1158L		parallel	2021-04-02	ORF1ab	NSP3	340	P
1160		H1160Y		parallel	2020-07-15	ORF1ab	NSP3	342	H
1160		H1160Y, H1160R		parallel	2021-03-16	ORF1ab	NSP3	342	H
1168	T1168I			fixation	2021-04-02	ORF1ab	NSP3	350	T
1168	T1168I	T1168I	T1168I	paraFix	2021-07-01	ORF1ab	NSP3	350	T
1168	T1168I			fixation	2021-04-30	ORF1ab	NSP3	350	T
1168	T1168I			fixation	2021-06-02	ORF1ab	NSP3	350	T
1168	T1168I			fixation	2021-06-15	ORF1ab	NSP3	350	T
1168	T1168I			fixation	2021-05-17	ORF1ab	NSP3	350	T
1168	T1168I			fixation	2021-04-15	ORF1ab	NSP3	350	T
1170		R1170C, R1170H		parallel	2020-11-02	ORF1ab	NSP3	352	R
1170		R1170H, R1170C		parallel	2020-11-16	ORF1ab	NSP3	352	R
1170		R1170C		parallel	2020-12-15	ORF1ab	NSP3	352	R
1170		R1170C		parallel	2021-03-01	ORF1ab	NSP3	352	R
1170		R1170C		parallel	2021-01-01	ORF1ab	NSP3	352	R
1170		R1170C		parallel	2020-12-01	ORF1ab	NSP3	352	R
1170		R1170C		parallel	2021-01-15	ORF1ab	NSP3	352	R
1175	L1175F			fixation	2021-04-15	ORF1ab	NSP3	357	L
1175	L1175F			fixation	2021-06-02	ORF1ab	NSP3	357	L
1175	L1175F			fixation	2021-04-30	ORF1ab	NSP3	357	L
1175	L1175F			fixation	2021-05-17	ORF1ab	NSP3	357	L
1188	S1188L			fixation	2021-02-15	ORF1ab	NSP3	370	S
1188	S1188L			fixation	2021-06-15	ORF1ab	NSP3	370	S
1188	S1188L			fixation	2021-04-02	ORF1ab	NSP3	370	S
1188	S1188L			fixation	2021-04-30	ORF1ab	NSP3	370	S
1188	S1188L			fixation	2021-05-17	ORF1ab	NSP3	370	S
1188	S1188L			fixation	2021-04-15	ORF1ab	NSP3	370	S
1188	S1188L			fixation	2021-07-01	ORF1ab	NSP3	370	S
1188	S1188L			fixation	2021-06-02	ORF1ab	NSP3	370	S
1188	S1188L			fixation	2021-03-01	ORF1ab	NSP3	370	S
1202		K1202N		parallel	2021-05-17	ORF1ab	NSP3	384	K
1202	K1202N	K1202N	K1202N	paraFix	2020-12-01	ORF1ab	NSP3	384	K
1202		K1202N		parallel	2021-04-02	ORF1ab	NSP3	384	K
1202		K1202N		parallel	2021-04-15	ORF1ab	NSP3	384	K
1202	K1202N	K1202N	K1202N	paraFix	2020-11-16	ORF1ab	NSP3	384	K
1202		K1202N		parallel	2021-03-01	ORF1ab	NSP3	384	K
1202		K1202N		parallel	2021-03-16	ORF1ab	NSP3	384	K
1246	T1246I			fixation	2020-11-02	ORF1ab	NSP3	428	T
1246	T1246I			fixation	2020-09-15	ORF1ab	NSP3	428	T
1246	T1246I			fixation	2021-03-16	ORF1ab	NSP3	428	T
1246	T1246I			fixation	2021-04-15	ORF1ab	NSP3	428	T
1246	T1246I			fixation	2020-09-01	ORF1ab	NSP3	428	T
1246	T1246I			fixation	2021-07-01	ORF1ab	NSP3	428	T
1246	T1246I			fixation	2021-02-15	ORF1ab	NSP3	428	T
1246	T1246I			fixation	2020-10-01	ORF1ab	NSP3	428	T
1246	T1246I			fixation	2021-05-17	ORF1ab	NSP3	428	T
1246	T1246I			fixation	2020-11-16	ORF1ab	NSP3	428	T
1246	T1246I			fixation	2021-02-01	ORF1ab	NSP3	428	T
1246	T1246I			fixation	2020-08-14	ORF1ab	NSP3	428	T
1246	T1246I			fixation	2021-04-30	ORF1ab	NSP3	428	T
1246	T1246I			fixation	2021-03-01	ORF1ab	NSP3	428	T
1246	T1246I			fixation	2020-12-01	ORF1ab	NSP3	428	T
1246	T1246I			fixation	2020-12-15	ORF1ab	NSP3	428	T
1246	T1246I			fixation	2021-01-15	ORF1ab	NSP3	428	T
1246	T1246I			fixation	2021-06-02	ORF1ab	NSP3	428	T
1246	T1246I			fixation	2021-06-15	ORF1ab	NSP3	428	T
1246	T1246I			fixation	2021-04-02	ORF1ab	NSP3	428	T
1246	T1246I			fixation	2020-10-15	ORF1ab	NSP3	428	T
1246	T1246I			fixation	2020-07-31	ORF1ab	NSP3	428	T
1246	T1246I			fixation	2021-01-01	ORF1ab	NSP3	428	T
1287		V1287M		parallel	2021-02-01	ORF1ab	NSP3	469	V
1291		V1291F, V1291I		parallel	2021-03-16	ORF1ab	NSP3	473	V
1291		V1291I, V1291F		parallel	2021-03-01	ORF1ab	NSP3	473	V
1291		V1291F, V1291I		parallel	2021-04-15	ORF1ab	NSP3	473	V
1291		V1291F, V1291I		parallel	2021-04-30	ORF1ab	NSP3	473	V
1291		V1291F, V1291I		parallel	2021-04-02	ORF1ab	NSP3	473	V
1298		A1298V		parallel	2021-04-30	ORF1ab	NSP3	480	A
1306	A1306S			fixation	2021-06-02	ORF1ab	NSP3	488	A
1306	A1306S			fixation	2021-06-15	ORF1ab	NSP3	488	A
1306	A1306S			fixation	2021-07-01	ORF1ab	NSP3	488	A
1361	S1361P			fixation	2020-12-01	ORF1ab	NSP3	543	S
1375	L1375F			fixation	2020-07-01	ORF1ab	NSP3	557	L
1375	L1375F			fixation	2020-06-01	ORF1ab	NSP3	557	L
1375	L1375F			fixation	2020-06-15	ORF1ab	NSP3	557	L
1473		A1473V, A1473T		parallel	2020-11-16	ORF1ab	NSP3	655	A
1507		L1507F		parallel	2021-06-15	ORF1ab	NSP3	689	L
1567		T1567A, T1567I		parallel	2021-04-30	ORF1ab	NSP3	749	T
1567		T1567A, T1567I		parallel	2021-06-02	ORF1ab	NSP3	749	T
1567		T1567A, T1567I		parallel	2021-02-01	ORF1ab	NSP3	749	T
1567		T1567I		parallel	2021-01-15	ORF1ab	NSP3	749	T
1567		T1567A, T1567I		parallel	2021-07-01	ORF1ab	NSP3	749	T
1567	T1567I	T1567A, T1567I	T1567I	paraFix	2021-06-15	ORF1ab	NSP3	749	T
1567		T1567I, T1567A		parallel	2021-05-17	ORF1ab	NSP3	749	T
1567		T1567A, T1567I		parallel	2021-04-15	ORF1ab	NSP3	749	T
1567		T1567I		parallel	2020-11-16	ORF1ab	NSP3	749	T
1592		Q1592R		parallel	2021-05-17	ORF1ab	NSP3	774	Q
1612		S1612L		parallel	2021-03-01	ORF1ab	NSP3	794	S
1612	S1612L			fixation	2021-04-30	ORF1ab	NSP3	794	S
1640		P1640L, P1640H, P1640F		parallel	2020-12-15	ORF1ab	NSP3	822	P
1640		P1640H, P1640L, P1640S		parallel	2021-02-15	ORF1ab	NSP3	822	P
1640	P1640L	P1640L, P1640H, P1640S	P1640L	paraFix	2021-06-02	ORF1ab	NSP3	822	P
1640	P1640L	P1640L, P1640S	P1640L	paraFix	2021-05-17	ORF1ab	NSP3	822	P
1640	P1640L	P1640L, P1640S	P1640L	paraFix	2021-07-01	ORF1ab	NSP3	822	P
1640		P1640H, P1640S, P1640L		parallel	2021-03-01	ORF1ab	NSP3	822	P
1640		P1640H, P1640L, P1640S		parallel	2021-02-01	ORF1ab	NSP3	822	P
1640		P1640S, P1640L		parallel	2020-10-15	ORF1ab	NSP3	822	P
1640		P1640L, P1640H, P1640S		parallel	2020-11-16	ORF1ab	NSP3	822	P
1640		P1640S, P1640H, P1640L		parallel	2021-01-15	ORF1ab	NSP3	822	P
1640		P1640L, P1640S		parallel	2020-09-15	ORF1ab	NSP3	822	P
1640	P1640L	P1640L	P1640L	paraFix	2021-04-30	ORF1ab	NSP3	822	P
1640	P1640L	P1640L, P1640S	P1640L	paraFix	2021-06-15	ORF1ab	NSP3	822	P
1640		P1640S, P1640L		parallel	2021-01-01	ORF1ab	NSP3	822	P
1640	P1640L	P1640H, P1640L, L1640P, P1640S	P1640L	paraFix	2021-04-02	ORF1ab	NSP3	822	P
1640	P1640L	P1640S, P1640L	P1640L	paraFix	2021-04-15	ORF1ab	NSP3	822	P
1647		M1647I, M1647V		parallel	2021-03-16	ORF1ab	NSP3	829	M
1647		M1647I		parallel	2021-01-15	ORF1ab	NSP3	829	M
1647		M1647I		parallel	2020-12-01	ORF1ab	NSP3	829	M
1655	K1655N			fixation	2021-02-01	ORF1ab	NSP3	837	K
1655	K1655N	K1655N	K1655N	paraFix	2021-02-15	ORF1ab	NSP3	837	K
1655	K1655N	N1655K, K1655N	K1655N	paraFix	2021-04-30	ORF1ab	NSP3	837	K
1655	K1655N	K1655N, N1655K	K1655N	paraFix	2021-05-17	ORF1ab	NSP3	837	K
1655	K1655N			fixation	2021-06-15	ORF1ab	NSP3	837	K
1655	K1655N	K1655N	K1655N	paraFix	2021-01-01	ORF1ab	NSP3	837	K
1655	K1655N			fixation	2021-04-02	ORF1ab	NSP3	837	K
1655	K1655N			fixation	2020-12-15	ORF1ab	NSP3	837	K
1655	K1655N			fixation	2021-01-15	ORF1ab	NSP3	837	K
1655	K1655N			fixation	2021-06-02	ORF1ab	NSP3	837	K
1655	K1655N			fixation	2021-04-15	ORF1ab	NSP3	837	K
1655	K1655N			fixation	2021-07-01	ORF1ab	NSP3	837	K
1655	K1655N			fixation	2021-03-01	ORF1ab	NSP3	837	K
1657	K1657E			fixation	2021-05-17	ORF1ab	NSP3	839	K
1657	K1657E			fixation	2021-06-02	ORF1ab	NSP3	839	K
1657	K1657E			fixation	2021-06-15	ORF1ab	NSP3	839	K
1692		P1692S		parallel	2021-04-02	ORF1ab	NSP3	874	P
1708	A1708D			fixation	2021-03-01	ORF1ab	NSP3	890	A
1708	A1708D			fixation	2021-02-15	ORF1ab	NSP3	890	A
1708	A1708D			fixation	2021-01-15	ORF1ab	NSP3	890	A
1708	A1708D			fixation	2021-07-01	ORF1ab	NSP3	890	A
1708	A1708D			fixation	2021-02-01	ORF1ab	NSP3	890	A
1708	A1708D			fixation	2021-06-02	ORF1ab	NSP3	890	A
1708	A1708D			fixation	2021-04-30	ORF1ab	NSP3	890	A
1708	A1708D			fixation	2021-05-17	ORF1ab	NSP3	890	A
1708	A1708D			fixation	2021-03-16	ORF1ab	NSP3	890	A
1708	A1708D			fixation	2021-04-15	ORF1ab	NSP3	890	A
1708	A1708D			fixation	2021-06-15	ORF1ab	NSP3	890	A
1708	A1708D			fixation	2021-04-02	ORF1ab	NSP3	890	A
1769		M1769I		parallel	2020-09-15	ORF1ab	NSP3	951	M
1769	M1769I			fixation	2020-07-31	ORF1ab	NSP3	951	M
1769		M1769I		parallel	2020-10-01	ORF1ab	NSP3	951	M
1769		M1769I		parallel	2020-06-15	ORF1ab	NSP3	951	M
1769		M1769I		parallel	2020-11-02	ORF1ab	NSP3	951	M
1769	M1769I, I1769M	M1769I, I1769M	M1769I, I1769M	paraFix	2020-08-14	ORF1ab	NSP3	951	M
1769		M1769I		parallel	2020-10-15	ORF1ab	NSP3	951	M
1769	M1769I	M1769I	M1769I	paraFix	2020-09-01	ORF1ab	NSP3	951	M
1795	K1795Q			fixation	2021-06-02	ORF1ab	NSP3	977	K
1795	K1795Q			fixation	2021-04-15	ORF1ab	NSP3	977	K
1795	K1795Q			fixation	2021-04-30	ORF1ab	NSP3	977	K
1795	K1795Q			fixation	2021-02-15	ORF1ab	NSP3	977	K
1795	K1795Q			fixation	2021-06-15	ORF1ab	NSP3	977	K
1795	K1795Q			fixation	2021-05-17	ORF1ab	NSP3	977	K
1795	K1795Q			fixation	2021-04-02	ORF1ab	NSP3	977	K
1795	K1795Q			fixation	2021-07-01	ORF1ab	NSP3	977	K
1795	K1795Q			fixation	2021-03-01	ORF1ab	NSP3	977	K
1810	P1810L			fixation	2021-04-30	ORF1ab	NSP3	992	P
1810	P1810L			fixation	2021-06-15	ORF1ab	NSP3	992	P
1812	A1812D	A1812D	A1812D	paraFix	2020-11-16	ORF1ab	NSP3	994	A
1812	A1812D			fixation	2021-01-15	ORF1ab	NSP3	994	A
1812	A1812D			fixation	2021-02-15	ORF1ab	NSP3	994	A
1812	A1812D	A1812D, A1812V	A1812D	paraFix	2021-02-01	ORF1ab	NSP3	994	A
1812	A1812D			fixation	2020-12-15	ORF1ab	NSP3	994	A
1812	A1812D			fixation	2021-01-01	ORF1ab	NSP3	994	A
1812	A1812D			fixation	2020-12-01	ORF1ab	NSP3	994	A
1812		A1812V, A1812D		parallel	2021-03-01	ORF1ab	NSP3	994	A
1822		T1822I		parallel	2021-04-02	ORF1ab	NSP3	1004	T
1840		T1840I		parallel	2021-03-16	ORF1ab	NSP3	1022	T
1840	T1840I			fixation	2020-09-15	ORF1ab	NSP3	1022	T
1840		T1840I		parallel	2021-05-17	ORF1ab	NSP3	1022	T
1840		T1840I		parallel	2020-12-15	ORF1ab	NSP3	1022	T
1840		T1840I		parallel	2020-11-16	ORF1ab	NSP3	1022	T
1881		T1881I		parallel	2020-10-15	ORF1ab	NSP3	1063	T
1881		T1881I		parallel	2021-05-17	ORF1ab	NSP3	1063	T
1881		T1881I		parallel	2021-03-01	ORF1ab	NSP3	1063	T
1881		T1881I		parallel	2021-06-15	ORF1ab	NSP3	1063	T
1881		T1881I		parallel	2021-04-15	ORF1ab	NSP3	1063	T
1881		T1881I		parallel	2021-02-15	ORF1ab	NSP3	1063	T
1881		T1881I		parallel	2021-04-02	ORF1ab	NSP3	1063	T
1881		T1881I		parallel	2020-12-15	ORF1ab	NSP3	1063	T
1881		T1881I		parallel	2021-03-16	ORF1ab	NSP3	1063	T
1895		K1895R, K1895N, K1895E		parallel	2021-01-01	ORF1ab	NSP3	1077	K
1895		K1895N		parallel	2021-03-01	ORF1ab	NSP3	1077	K
1895		K1895N		parallel	2021-04-30	ORF1ab	NSP3	1077	K
1895		K1895N		parallel	2020-12-01	ORF1ab	NSP3	1077	K
1895		K1895N		parallel	2021-02-15	ORF1ab	NSP3	1077	K
1921		P1921S, P1921L		parallel	2021-01-01	ORF1ab	NSP3	1103	P
1921		P1921S		parallel	2021-03-01	ORF1ab	NSP3	1103	P
1921		P1921S, P1921L, P1921Q		parallel	2020-12-01	ORF1ab	NSP3	1103	P
1921		P1921L, P1921S		parallel	2020-07-31	ORF1ab	NSP3	1103	P
1921		P1921S, P1921L		parallel	2021-01-15	ORF1ab	NSP3	1103	P
1921		P1921L, P1921S		parallel	2020-12-15	ORF1ab	NSP3	1103	P
1921		P1921S, P1921L		parallel	2021-02-01	ORF1ab	NSP3	1103	P
1921	P1921S	P1921S	P1921S	paraFix	2020-07-01	ORF1ab	NSP3	1103	P
1921		P1921L, P1921S		parallel	2020-07-15	ORF1ab	NSP3	1103	P
1921		P1921S, P1921Q, P1921L		parallel	2021-05-17	ORF1ab	NSP3	1103	P
1997	A1997V			fixation	2021-04-30	ORF1ab	NSP3	1179	A
2007	T2007I			fixation	2021-04-30	ORF1ab	NSP3	1189	T
2007	T2007I			fixation	2021-06-15	ORF1ab	NSP3	1189	T
2007	T2007I			fixation	2021-04-15	ORF1ab	NSP3	1189	T
2007	T2007I			fixation	2021-05-17	ORF1ab	NSP3	1189	T
2007	T2007I			fixation	2021-06-02	ORF1ab	NSP3	1189	T
2007		T2007I		parallel	2021-02-15	ORF1ab	NSP3	1189	T
2007	T2007I			fixation	2021-07-01	ORF1ab	NSP3	1189	T
2015	S2015R			fixation	2020-09-01	ORF1ab	NSP3	1197	S
2015	S2015R			fixation	2020-12-15	ORF1ab	NSP3	1197	S
2015	S2015R			fixation	2020-11-16	ORF1ab	NSP3	1197	S
2015	S2015R			fixation	2020-07-01	ORF1ab	NSP3	1197	S
2015	S2015R			fixation	2020-10-01	ORF1ab	NSP3	1197	S
2015	S2015R			fixation	2020-08-14	ORF1ab	NSP3	1197	S
2015	S2015R			fixation	2020-07-31	ORF1ab	NSP3	1197	S
2015	S2015R			fixation	2020-07-15	ORF1ab	NSP3	1197	S
2015	S2015R			fixation	2020-09-15	ORF1ab	NSP3	1197	S
2015	S2015R			fixation	2020-06-15	ORF1ab	NSP3	1197	S
2015	S2015R			fixation	2020-10-15	ORF1ab	NSP3	1197	S
2015	S2015R			fixation	2020-06-01	ORF1ab	NSP3	1197	S
2016	T2016K			fixation	2020-12-15	ORF1ab	NSP3	1198	T
2016	T2016K	T2016I, T2016K	T2016K	paraFix	2021-04-02	ORF1ab	NSP3	1198	T
2016	T2016K	T2016I, K2016T, T2016K	T2016K	paraFix	2021-07-01	ORF1ab	NSP3	1198	T
2016	T2016K, T2016I	T2016I, T2016K	T2016I, T2016K	paraFix	2021-04-30	ORF1ab	NSP3	1198	T
2016	T2016K	T2016I, T2016K	T2016K	paraFix	2021-03-16	ORF1ab	NSP3	1198	T
2016	T2016K			fixation	2020-07-15	ORF1ab	NSP3	1198	T
2016	T2016K			fixation	2020-06-15	ORF1ab	NSP3	1198	T
2016	T2016K	T2016K, T2016I	T2016K	paraFix	2021-05-17	ORF1ab	NSP3	1198	T
2016	T2016K			fixation	2020-11-02	ORF1ab	NSP3	1198	T
2016	T2016K			fixation	2020-07-01	ORF1ab	NSP3	1198	T
2016	T2016I, T2016K	T2016K, T2016I	T2016K, T2016I	paraFix	2021-01-15	ORF1ab	NSP3	1198	T
2016	T2016K			fixation	2020-10-15	ORF1ab	NSP3	1198	T
2016	T2016K	T2016K, T2016I	T2016K	paraFix	2021-06-15	ORF1ab	NSP3	1198	T
2016	T2016K			fixation	2020-09-01	ORF1ab	NSP3	1198	T
2016	T2016K	T2016I, T2016K	T2016K	paraFix	2020-12-01	ORF1ab	NSP3	1198	T
2016	T2016K, T2016I	T2016I, T2016K	T2016I, T2016K	paraFix	2021-02-15	ORF1ab	NSP3	1198	T
2016	T2016K	T2016I, T2016K	T2016K	paraFix	2021-06-02	ORF1ab	NSP3	1198	T
2016	T2016K			fixation	2020-10-01	ORF1ab	NSP3	1198	T
2016	T2016K	T2016I, T2016K	T2016K	paraFix	2021-04-15	ORF1ab	NSP3	1198	T
2016	T2016K			fixation	2020-06-01	ORF1ab	NSP3	1198	T
2016	T2016K			fixation	2020-07-31	ORF1ab	NSP3	1198	T
2016	T2016K			fixation	2020-09-15	ORF1ab	NSP3	1198	T
2016	T2016K, T2016I	T2016I, T2016K	T2016I, T2016K	paraFix	2021-02-01	ORF1ab	NSP3	1198	T
2016	T2016K			fixation	2020-08-14	ORF1ab	NSP3	1198	T
2016	T2016K			fixation	2020-11-16	ORF1ab	NSP3	1198	T
2016	T2016K, T2016I	T2016I, T2016K	T2016I, T2016K	paraFix	2021-01-01	ORF1ab	NSP3	1198	T
2016	T2016K, T2016I	T2016I, T2016K	T2016I, T2016K	paraFix	2021-03-01	ORF1ab	NSP3	1198	T
2030		S2030L		parallel	2021-01-15	ORF1ab	NSP3	1212	S
2030		S2030L		parallel	2021-03-16	ORF1ab	NSP3	1212	S
2033		A2033T, A2033V		parallel	2021-03-16	ORF1ab	NSP3	1215	A
2046	P2046L	P2046L, P2046S	P2046L	paraFix	2021-07-01	ORF1ab	NSP3	1228	P
2046		P2046L		parallel	2020-09-01	ORF1ab	NSP3	1228	P
2046	P2046L	P2046L	P2046L	paraFix	2021-06-15	ORF1ab	NSP3	1228	P
2046	P2046L	P2046S, P2046L	P2046L	paraFix	2021-06-02	ORF1ab	NSP3	1228	P
2046		P2046L		parallel	2020-09-15	ORF1ab	NSP3	1228	P
2046		P2046L, P2046S		parallel	2021-05-17	ORF1ab	NSP3	1228	P
2046		P2046S, P2046L		parallel	2021-04-02	ORF1ab	NSP3	1228	P
2046		P2046S, P2046L		parallel	2020-10-01	ORF1ab	NSP3	1228	P
2046		P2046S, P2046L		parallel	2020-11-02	ORF1ab	NSP3	1228	P
2103		S2103F		parallel	2020-11-16	ORF1ab	NSP3	1285	S
2119		L2119F		parallel	2021-04-30	ORF1ab	NSP3	1301	L
2121	T2121I	T2121I	T2121I	paraFix	2021-07-01	ORF1ab	NSP3	1303	T
2152	T2152I			fixation	2021-04-15	ORF1ab	NSP3	1334	T
2153		T2153I		parallel	2021-02-01	ORF1ab	NSP3	1335	T
2166		T2166I		parallel	2021-04-15	ORF1ab	NSP3	1348	T
2200		K2200N		parallel	2021-04-30	ORF1ab	NSP3	1382	K
2230	I2230T			fixation	2021-01-15	ORF1ab	NSP3	1412	I
2230	I2230T			fixation	2021-06-02	ORF1ab	NSP3	1412	I
2230	I2230T			fixation	2021-04-15	ORF1ab	NSP3	1412	I
2230	I2230T			fixation	2021-02-15	ORF1ab	NSP3	1412	I
2230	I2230T			fixation	2021-04-30	ORF1ab	NSP3	1412	I
2230	I2230T			fixation	2021-02-01	ORF1ab	NSP3	1412	I
2230	I2230T			fixation	2021-04-02	ORF1ab	NSP3	1412	I
2230	I2230T			fixation	2021-03-01	ORF1ab	NSP3	1412	I
2230	I2230T			fixation	2021-07-01	ORF1ab	NSP3	1412	I
2230	I2230T			fixation	2021-03-16	ORF1ab	NSP3	1412	I
2230	I2230T			fixation	2021-06-15	ORF1ab	NSP3	1412	I
2230	I2230T			fixation	2021-05-17	ORF1ab	NSP3	1412	I
2242		S2242F		parallel	2021-07-01	ORF1ab	NSP3	1424	S
2259		M2259I		parallel	2020-12-01	ORF1ab	NSP3	1441	M
2259	M2259I			fixation	2021-06-02	ORF1ab	NSP3	1441	M
2259	M2259I			fixation	2021-07-01	ORF1ab	NSP3	1441	M
2259	M2259I			fixation	2021-04-30	ORF1ab	NSP3	1441	M
2259	M2259I			fixation	2021-05-17	ORF1ab	NSP3	1441	M
2259	M2259I			fixation	2021-06-15	ORF1ab	NSP3	1441	M
2274		T2274I		parallel	2021-01-15	ORF1ab	NSP3	1456	T
2274		T2274I		parallel	2020-12-15	ORF1ab	NSP3	1456	T
2287		P2287S		parallel	2021-04-02	ORF1ab	NSP3	1469	P
2287	P2287S	P2287S, S2287P	P2287S	paraFix	2021-05-17	ORF1ab	NSP3	1469	P
2287	P2287S	P2287S	P2287S	paraFix	2021-06-15	ORF1ab	NSP3	1469	P
2287	P2287S	P2287S	P2287S	paraFix	2021-06-02	ORF1ab	NSP3	1469	P
2287	P2287S	P2287S	P2287S	paraFix	2021-07-01	ORF1ab	NSP3	1469	P
2345		A2345V		parallel	2021-07-01	ORF1ab	NSP3	1527	A
2355		A2355S		parallel	2021-01-01	ORF1ab	NSP3	1537	A
2355		A2355S		parallel	2021-01-15	ORF1ab	NSP3	1537	A
2376		P2376L		parallel	2021-02-15	ORF1ab	NSP3	1558	P
2376		P2376L		parallel	2021-03-16	ORF1ab	NSP3	1558	P
2376		P2376L		parallel	2021-03-01	ORF1ab	NSP3	1558	P
2387	F2387V			fixation	2021-05-17	ORF1ab	NSP3	1569	F
2387	F2387V			fixation	2021-06-15	ORF1ab	NSP3	1569	F
2501	I2501T			fixation	2021-05-17	ORF1ab	NSP3	1683	I
2501	I2501T			fixation	2021-04-30	ORF1ab	NSP3	1683	I
2501	I2501T			fixation	2021-03-16	ORF1ab	NSP3	1683	I
2501	I2501T			fixation	2020-09-01	ORF1ab	NSP3	1683	I
2501	I2501T	I2501T, I2501F	I2501T	paraFix	2021-02-01	ORF1ab	NSP3	1683	I
2501	I2501T			fixation	2021-06-02	ORF1ab	NSP3	1683	I
2501	I2501T			fixation	2021-03-01	ORF1ab	NSP3	1683	I
2501	I2501T			fixation	2021-02-15	ORF1ab	NSP3	1683	I
2501	I2501T			fixation	2020-12-01	ORF1ab	NSP3	1683	I
2501	I2501T			fixation	2021-01-15	ORF1ab	NSP3	1683	I
2501	I2501T			fixation	2021-04-02	ORF1ab	NSP3	1683	I
2501	I2501T			fixation	2021-04-15	ORF1ab	NSP3	1683	I
2501	I2501T			fixation	2021-06-15	ORF1ab	NSP3	1683	I
2501	I2501T			fixation	2021-01-01	ORF1ab	NSP3	1683	I
2501	I2501T	I2501T	I2501T	paraFix	2020-12-15	ORF1ab	NSP3	1683	I
2501	I2501T			fixation	2020-11-16	ORF1ab	NSP3	1683	I
2511	K2511N	K2511N	K2511N	paraFix	2021-06-15	ORF1ab	NSP3	1693	K
2529		A2529V		parallel	2020-11-16	ORF1ab	NSP3	1711	A
2529		A2529V		parallel	2021-06-15	ORF1ab	NSP3	1711	A
2588		V2588F		parallel	2021-04-02	ORF1ab	NSP3	1770	V
2596	N2596S			fixation	2021-04-30	ORF1ab	NSP3	1778	N
2596	N2596S			fixation	2021-06-15	ORF1ab	NSP3	1778	N
2606	M2606I			fixation	2021-04-15	ORF1ab	NSP3	1788	M
2606	M2606I			fixation	2021-04-02	ORF1ab	NSP3	1788	M
2606	M2606I			fixation	2020-11-16	ORF1ab	NSP3	1788	M
2606	M2606I, I2606M			fixation	2021-06-15	ORF1ab	NSP3	1788	M
2606	M2606I			fixation	2021-02-01	ORF1ab	NSP3	1788	M
2606	M2606I			fixation	2021-01-01	ORF1ab	NSP3	1788	M
2606	M2606I			fixation	2021-03-01	ORF1ab	NSP3	1788	M
2606	M2606I			fixation	2020-12-01	ORF1ab	NSP3	1788	M
2606	M2606I			fixation	2021-06-02	ORF1ab	NSP3	1788	M
2606	M2606I			fixation	2021-01-15	ORF1ab	NSP3	1788	M
2606	M2606I			fixation	2021-02-15	ORF1ab	NSP3	1788	M
2606	M2606I			fixation	2020-12-15	ORF1ab	NSP3	1788	M
2606	M2606I			fixation	2021-04-30	ORF1ab	NSP3	1788	M
2606	M2606I			fixation	2021-03-16	ORF1ab	NSP3	1788	M
2615	T2615I	T2615I	T2615I	paraFix	2021-06-15	ORF1ab	NSP3	1797	T
2615		T2615I		parallel	2021-05-17	ORF1ab	NSP3	1797	T
2636		A2636V, A2636T		parallel	2020-12-15	ORF1ab	NSP3	1818	A
2685		P2685T, P2685S		parallel	2020-11-16	ORF1ab	NSP3	1867	P
2685		P2685T		parallel	2020-12-15	ORF1ab	NSP3	1867	P
2702	Q2702H			fixation	2020-07-31	ORF1ab	NSP3	1884	Q
2702	Q2702H			fixation	2020-09-15	ORF1ab	NSP3	1884	Q
2702	Q2702H			fixation	2020-11-16	ORF1ab	NSP3	1884	Q
2702		Q2702H		parallel	2021-06-15	ORF1ab	NSP3	1884	Q
2702	Q2702H			fixation	2020-12-15	ORF1ab	NSP3	1884	Q
2702		Q2702H		parallel	2021-02-01	ORF1ab	NSP3	1884	Q
2702		Q2702H		parallel	2021-06-02	ORF1ab	NSP3	1884	Q
2702		Q2702H		parallel	2020-06-01	ORF1ab	NSP3	1884	Q
2702	Q2702H			fixation	2020-06-15	ORF1ab	NSP3	1884	Q
2702	Q2702H			fixation	2020-09-01	ORF1ab	NSP3	1884	Q
2702	Q2702H			fixation	2020-10-01	ORF1ab	NSP3	1884	Q
2702	Q2702H	Q2702H	Q2702H	paraFix	2020-07-01	ORF1ab	NSP3	1884	Q
2702	Q2702H			fixation	2020-11-02	ORF1ab	NSP3	1884	Q
2702	Q2702H			fixation	2020-08-14	ORF1ab	NSP3	1884	Q
2702		Q2702H		parallel	2021-04-15	ORF1ab	NSP3	1884	Q
2702	Q2702H			fixation	2021-01-15	ORF1ab	NSP3	1884	Q
2702	Q2702H			fixation	2020-12-01	ORF1ab	NSP3	1884	Q
2702		Q2702H		parallel	2021-03-01	ORF1ab	NSP3	1884	Q
2702	Q2702H	Q2702H	Q2702H	paraFix	2020-10-15	ORF1ab	NSP3	1884	Q
2739		P2739L		parallel	2021-03-16	ORF1ab	NSP3	1921	P
2739		P2739L		parallel	2021-02-01	ORF1ab	NSP3	1921	P
2739		P2739L		parallel	2021-02-15	ORF1ab	NSP3	1921	P
2739		P2739L		parallel	2021-04-02	ORF1ab	NSP3	1921	P
2761		K2761N		parallel	2021-04-02	ORF1ab	NSP3	1943	K
2769	W2769C			fixation	2021-04-30	ORF1ab	NSP4	6	W
2769	W2769C			fixation	2021-03-01	ORF1ab	NSP4	6	W
2769	W2769C			fixation	2021-02-15	ORF1ab	NSP4	6	W
2769		W2769C		parallel	2020-09-15	ORF1ab	NSP4	6	W
2769	W2769C			fixation	2021-01-15	ORF1ab	NSP4	6	W
2780		F2780L		parallel	2021-07-01	ORF1ab	NSP4	17	F
2780	F2780L			fixation	2021-06-15	ORF1ab	NSP4	17	F
2780	F2780L			fixation	2021-04-15	ORF1ab	NSP4	17	F
2780	F2780L			fixation	2021-05-17	ORF1ab	NSP4	17	F
2780	F2780L			fixation	2021-04-30	ORF1ab	NSP4	17	F
2780		F2780S, F2780L		parallel	2021-04-02	ORF1ab	NSP4	17	F
2791	T2791I			fixation	2021-01-01	ORF1ab	NSP4	28	T
2791	T2791I			fixation	2021-04-30	ORF1ab	NSP4	28	T
2791	T2791I			fixation	2021-02-01	ORF1ab	NSP4	28	T
2791	T2791I			fixation	2021-03-01	ORF1ab	NSP4	28	T
2791	T2791I			fixation	2021-02-15	ORF1ab	NSP4	28	T
2791	T2791I			fixation	2021-01-15	ORF1ab	NSP4	28	T
2796	M2796I			fixation	2020-06-01	ORF1ab	NSP4	33	M
2796	M2796I			fixation	2020-10-01	ORF1ab	NSP4	33	M
2796	M2796I			fixation	2020-09-01	ORF1ab	NSP4	33	M
2796	M2796I	M2796L, M2796I	M2796I	paraFix	2020-06-15	ORF1ab	NSP4	33	M
2796	M2796I	M2796L, M2796I	M2796I	paraFix	2020-08-14	ORF1ab	NSP4	33	M
2796	M2796I			fixation	2020-09-15	ORF1ab	NSP4	33	M
2796		M2796I, M2796L		parallel	2020-11-16	ORF1ab	NSP4	33	M
2796		M2796L, M2796I		parallel	2021-04-15	ORF1ab	NSP4	33	M
2796	M2796I	M2796L, M2796I	M2796I	paraFix	2020-07-15	ORF1ab	NSP4	33	M
2796	M2796I			fixation	2020-10-15	ORF1ab	NSP4	33	M
2796	M2796I	M2796L, M2796I	M2796I	paraFix	2020-07-31	ORF1ab	NSP4	33	M
2796		M2796I, M2796L		parallel	2021-03-16	ORF1ab	NSP4	33	M
2796		M2796I		parallel	2021-02-15	ORF1ab	NSP4	33	M
2796	M2796I			fixation	2020-07-01	ORF1ab	NSP4	33	M
2797		S2797F		parallel	2021-02-01	ORF1ab	NSP4	34	S
2813	D2813A			fixation	2021-01-15	ORF1ab	NSP4	50	D
2930	V2930L			fixation	2021-06-02	ORF1ab	NSP4	167	V
2930	V2930L			fixation	2021-07-01	ORF1ab	NSP4	167	V
2930	V2930L			fixation	2021-06-15	ORF1ab	NSP4	167	V
2936	T2936I			fixation	2021-06-15	ORF1ab	NSP4	173	T
2952		T2952I		parallel	2020-11-16	ORF1ab	NSP4	189	T
2952		T2952I		parallel	2020-12-15	ORF1ab	NSP4	189	T
2952		T2952I		parallel	2020-12-01	ORF1ab	NSP4	189	T
2967	T2967I			fixation	2021-06-15	ORF1ab	NSP4	204	T
2980		D2980G, D2980N		parallel	2021-07-01	ORF1ab	NSP4	217	D
2980		D2980N, D2980G		parallel	2021-04-02	ORF1ab	NSP4	217	D
2980		D2980N, D2980G		parallel	2021-06-02	ORF1ab	NSP4	217	D
2980		D2980A, D2980G, D2980N		parallel	2021-04-15	ORF1ab	NSP4	217	D
2980		D2980G, D2980N, D2980A		parallel	2021-05-17	ORF1ab	NSP4	217	D
2980		D2980G, D2980N, D2980A		parallel	2021-04-30	ORF1ab	NSP4	217	D
2980		D2980G, D2980N, D2980A, D2980E		parallel	2021-03-16	ORF1ab	NSP4	217	D
2980		D2980N, D2980G		parallel	2021-06-15	ORF1ab	NSP4	217	D
2981		S2981F		parallel	2021-04-15	ORF1ab	NSP4	218	S
2994		A2994V		parallel	2020-10-01	ORF1ab	NSP4	231	A
2994		A2994V		parallel	2020-11-16	ORF1ab	NSP4	231	A
2994		A2994V		parallel	2020-09-15	ORF1ab	NSP4	231	A
2994		A2994V		parallel	2021-04-02	ORF1ab	NSP4	231	A
2994		A2994V		parallel	2020-09-01	ORF1ab	NSP4	231	A
2994		A2994V		parallel	2020-07-15	ORF1ab	NSP4	231	A
2994		A2994V		parallel	2020-10-15	ORF1ab	NSP4	231	A
2994		A2994V		parallel	2020-12-01	ORF1ab	NSP4	231	A
2994		A2994V		parallel	2020-11-02	ORF1ab	NSP4	231	A
3027		L3027F		parallel	2021-03-01	ORF1ab	NSP4	264	L
3027		L3027F		parallel	2021-01-15	ORF1ab	NSP4	264	L
3042	D3042N			fixation	2021-04-15	ORF1ab	NSP4	279	D
3042	D3042N			fixation	2021-01-15	ORF1ab	NSP4	279	D
3042	D3042N			fixation	2020-12-15	ORF1ab	NSP4	279	D
3071	F3071Y			fixation	2020-09-15	ORF1ab	NSP4	308	F
3071	F3071Y			fixation	2020-07-01	ORF1ab	NSP4	308	F
3071	F3071Y			fixation	2020-10-01	ORF1ab	NSP4	308	F
3071	F3071Y			fixation	2020-06-15	ORF1ab	NSP4	308	F
3071	F3071Y			fixation	2021-04-30	ORF1ab	NSP4	308	F
3071	F3071Y			fixation	2021-06-02	ORF1ab	NSP4	308	F
3071	F3071Y			fixation	2020-12-15	ORF1ab	NSP4	308	F
3071	F3071Y			fixation	2020-11-02	ORF1ab	NSP4	308	F
3071	F3071Y			fixation	2020-08-14	ORF1ab	NSP4	308	F
3071	F3071Y			fixation	2020-07-31	ORF1ab	NSP4	308	F
3071	F3071Y			fixation	2021-04-15	ORF1ab	NSP4	308	F
3071	F3071Y			fixation	2021-03-16	ORF1ab	NSP4	308	F
3071	F3071Y			fixation	2021-05-17	ORF1ab	NSP4	308	F
3071	F3071Y			fixation	2020-06-01	ORF1ab	NSP4	308	F
3071	F3071Y			fixation	2020-10-15	ORF1ab	NSP4	308	F
3071	F3071Y			fixation	2021-06-15	ORF1ab	NSP4	308	F
3071	F3071Y			fixation	2020-09-01	ORF1ab	NSP4	308	F
3071	F3071Y			fixation	2020-07-15	ORF1ab	NSP4	308	F
3071	F3071Y			fixation	2021-02-15	ORF1ab	NSP4	308	F
3087	M3087I			fixation	2021-06-02	ORF1ab	NSP4	324	M
3087	M3087I			fixation	2021-05-17	ORF1ab	NSP4	324	M
3087	M3087I			fixation	2021-02-01	ORF1ab	NSP4	324	M
3087	M3087I			fixation	2020-12-01	ORF1ab	NSP4	324	M
3087	M3087I			fixation	2021-06-15	ORF1ab	NSP4	324	M
3087	M3087I			fixation	2021-04-30	ORF1ab	NSP4	324	M
3087	M3087I			fixation	2021-01-15	ORF1ab	NSP4	324	M
3087	M3087I			fixation	2021-04-02	ORF1ab	NSP4	324	M
3087	M3087I			fixation	2021-04-15	ORF1ab	NSP4	324	M
3087	M3087I			fixation	2020-11-16	ORF1ab	NSP4	324	M
3087	M3087I	M3087I	M3087I	paraFix	2021-01-01	ORF1ab	NSP4	324	M
3087	M3087I			fixation	2021-02-15	ORF1ab	NSP4	324	M
3087	M3087I			fixation	2021-03-16	ORF1ab	NSP4	324	M
3087	M3087I			fixation	2021-03-01	ORF1ab	NSP4	324	M
3087	M3087I			fixation	2020-12-15	ORF1ab	NSP4	324	M
3116		L3116F		parallel	2021-06-02	ORF1ab	NSP4	353	L
3116		L3116V, L3116F		parallel	2021-07-01	ORF1ab	NSP4	353	L
3143		A3143V		parallel	2021-07-01	ORF1ab	NSP4	380	A
3143		A3143V		parallel	2021-03-16	ORF1ab	NSP4	380	A
3143		A3143V		parallel	2021-04-02	ORF1ab	NSP4	380	A
3143		A3143V		parallel	2021-02-15	ORF1ab	NSP4	380	A
3143		A3143V		parallel	2021-02-01	ORF1ab	NSP4	380	A
3143	A3143V			fixation	2021-04-15	ORF1ab	NSP4	380	A
3143		A3143V		parallel	2021-06-02	ORF1ab	NSP4	380	A
3143	A3143V	A3143V	A3143V	paraFix	2021-04-30	ORF1ab	NSP4	380	A
3143		A3143V		parallel	2021-06-15	ORF1ab	NSP4	380	A
3149	S3149F			fixation	2021-06-15	ORF1ab	NSP4	386	S
3149	S3149F			fixation	2021-04-30	ORF1ab	NSP4	386	S
3158	S3158T			fixation	2021-06-15	ORF1ab	NSP4	395	S
3201		L3201I, L3201P		parallel	2021-03-16	ORF1ab	NSP4	438	L
3201		L3201P, L3201I		parallel	2021-04-02	ORF1ab	NSP4	438	L
3201	L3201P	L3201P, L3201I, P3201L	L3201P	paraFix	2021-05-17	ORF1ab	NSP4	438	L
3201	L3201P	L3201P, L3201I	L3201P	paraFix	2021-04-30	ORF1ab	NSP4	438	L
3201	L3201P, P3201L	L3201P, P3201L	L3201P, P3201L	paraFix	2021-07-01	ORF1ab	NSP4	438	L
3201		L3201P, L3201F, L3201I		parallel	2021-04-15	ORF1ab	NSP4	438	L
3201		L3201P, L3201F, L3201I		parallel	2021-03-01	ORF1ab	NSP4	438	L
3201	L3201P	L3201P, L3201I	L3201P	paraFix	2021-06-02	ORF1ab	NSP4	438	L
3201	L3201P	L3201P, L3201F	L3201P	paraFix	2021-06-15	ORF1ab	NSP4	438	L
3209		A3209V		parallel	2021-03-01	ORF1ab	NSP4	446	A
3209	A3209V	A3209V	A3209V	paraFix	2021-06-02	ORF1ab	NSP4	446	A
3209	A3209V	A3209V	A3209V	paraFix	2021-05-17	ORF1ab	NSP4	446	A
3209		A3209V		parallel	2021-04-30	ORF1ab	NSP4	446	A
3209	A3209V	A3209V	A3209V	paraFix	2021-06-15	ORF1ab	NSP4	446	A
3209		A3209V		parallel	2021-04-02	ORF1ab	NSP4	446	A
3209		A3209V		parallel	2021-04-15	ORF1ab	NSP4	446	A
3209	A3209V	A3209V, A3209S	A3209V	paraFix	2021-07-01	ORF1ab	NSP4	446	A
3221	M3221I			fixation	2021-03-01	ORF1ab	NSP4	458	M
3221		M3221I		parallel	2021-03-16	ORF1ab	NSP4	458	M
3221		M3221I		parallel	2021-04-30	ORF1ab	NSP4	458	M
3255		T3255I, T3255A		parallel	2021-02-15	ORF1ab	NSP4	492	T
3255	T3255I	T3255I	T3255I	paraFix	2021-04-15	ORF1ab	NSP4	492	T
3255	T3255I	T3255I, T3255A	T3255I	paraFix	2021-03-16	ORF1ab	NSP4	492	T
3255	T3255I	T3255I, I3255T	T3255I	paraFix	2021-07-01	ORF1ab	NSP4	492	T
3255		T3255I		parallel	2021-03-01	ORF1ab	NSP4	492	T
3255	T3255I	T3255I	T3255I	paraFix	2021-04-02	ORF1ab	NSP4	492	T
3255	T3255I	T3255I, I3255T	T3255I	paraFix	2021-06-02	ORF1ab	NSP4	492	T
3255	T3255I	T3255I	T3255I	paraFix	2021-04-30	ORF1ab	NSP4	492	T
3255		T3255I		parallel	2020-12-01	ORF1ab	NSP4	492	T
3255	T3255I	T3255I, I3255T	T3255I	paraFix	2021-05-17	ORF1ab	NSP4	492	T
3255		T3255I		parallel	2020-11-16	ORF1ab	NSP4	492	T
3255	T3255I	T3255I	T3255I	paraFix	2021-06-15	ORF1ab	NSP4	492	T
3278	G3278S			fixation	2020-11-02	ORF1ab	NSP5	15	G
3278	G3278S, S3278G			fixation	2020-06-15	ORF1ab	NSP5	15	G
3278	G3278S, S3278G			fixation	2020-07-01	ORF1ab	NSP5	15	G
3278	G3278S			fixation	2020-08-14	ORF1ab	NSP5	15	G
3278	G3278S			fixation	2020-12-01	ORF1ab	NSP5	15	G
3278	G3278S			fixation	2021-02-15	ORF1ab	NSP5	15	G
3278	G3278S			fixation	2020-12-15	ORF1ab	NSP5	15	G
3278	G3278S			fixation	2020-09-15	ORF1ab	NSP5	15	G
3278	G3278S			fixation	2021-06-15	ORF1ab	NSP5	15	G
3278	G3278S			fixation	2020-06-01	ORF1ab	NSP5	15	G
3278	G3278S			fixation	2021-04-15	ORF1ab	NSP5	15	G
3278	G3278S			fixation	2020-11-16	ORF1ab	NSP5	15	G
3278	G3278S			fixation	2021-04-02	ORF1ab	NSP5	15	G
3278	G3278S			fixation	2021-05-17	ORF1ab	NSP5	15	G
3278	G3278S			fixation	2020-09-01	ORF1ab	NSP5	15	G
3278	G3278S			fixation	2021-04-30	ORF1ab	NSP5	15	G
3278	G3278S			fixation	2020-10-15	ORF1ab	NSP5	15	G
3278	G3278S			fixation	2021-06-02	ORF1ab	NSP5	15	G
3278	G3278S			fixation	2021-03-01	ORF1ab	NSP5	15	G
3278	G3278S			fixation	2021-03-16	ORF1ab	NSP5	15	G
3278	G3278S			fixation	2020-07-31	ORF1ab	NSP5	15	G
3278	G3278S			fixation	2021-01-15	ORF1ab	NSP5	15	G
3278	G3278S			fixation	2021-07-01	ORF1ab	NSP5	15	G
3278	G3278S			fixation	2021-01-01	ORF1ab	NSP5	15	G
3278	G3278S			fixation	2020-10-01	ORF1ab	NSP5	15	G
3278	G3278S			fixation	2021-02-01	ORF1ab	NSP5	15	G
3284		T3284I		parallel	2020-12-15	ORF1ab	NSP5	21	T
3287	T3287A			fixation	2021-02-01	ORF1ab	NSP5	24	T
3287	T3287A			fixation	2021-03-01	ORF1ab	NSP5	24	T
3287	T3287A			fixation	2021-02-15	ORF1ab	NSP5	24	T
3287	T3287A			fixation	2021-01-01	ORF1ab	NSP5	24	T
3287	T3287A			fixation	2021-01-15	ORF1ab	NSP5	24	T
3287	T3287A			fixation	2021-04-30	ORF1ab	NSP5	24	T
3308		T3308I		parallel	2020-11-16	ORF1ab	NSP5	45	T
3334	G3334S			fixation	2020-07-31	ORF1ab	NSP5	71	G
3334	G3334S			fixation	2021-04-15	ORF1ab	NSP5	71	G
3334	G3334S			fixation	2020-09-15	ORF1ab	NSP5	71	G
3334	G3334S			fixation	2021-04-30	ORF1ab	NSP5	71	G
3334	G3334S			fixation	2021-01-15	ORF1ab	NSP5	71	G
3334	G3334S	G3334S, G3334V	G3334S	paraFix	2020-11-16	ORF1ab	NSP5	71	G
3334	G3334S			fixation	2020-11-02	ORF1ab	NSP5	71	G
3334	G3334S			fixation	2020-06-15	ORF1ab	NSP5	71	G
3334	G3334S			fixation	2020-10-01	ORF1ab	NSP5	71	G
3334	G3334S, S3334G			fixation	2020-08-14	ORF1ab	NSP5	71	G
3334	G3334S			fixation	2020-12-15	ORF1ab	NSP5	71	G
3334	G3334S			fixation	2021-03-01	ORF1ab	NSP5	71	G
3334	G3334S			fixation	2020-07-01	ORF1ab	NSP5	71	G
3334	G3334S			fixation	2020-10-15	ORF1ab	NSP5	71	G
3334	G3334S			fixation	2021-02-15	ORF1ab	NSP5	71	G
3334	G3334S			fixation	2021-01-01	ORF1ab	NSP5	71	G
3334	G3334S			fixation	2020-09-01	ORF1ab	NSP5	71	G
3334	G3334S			fixation	2021-02-01	ORF1ab	NSP5	71	G
3352	L3352F			fixation	2021-04-15	ORF1ab	NSP5	89	L
3352	L3352F			fixation	2021-02-01	ORF1ab	NSP5	89	L
3352	L3352F			fixation	2020-11-02	ORF1ab	NSP5	89	L
3352	L3352F			fixation	2021-02-15	ORF1ab	NSP5	89	L
3352	L3352F			fixation	2021-04-02	ORF1ab	NSP5	89	L
3352	L3352F	L3352F	L3352F	paraFix	2020-11-16	ORF1ab	NSP5	89	L
3352	L3352F			fixation	2021-04-30	ORF1ab	NSP5	89	L
3352	L3352F			fixation	2020-12-01	ORF1ab	NSP5	89	L
3352	L3352F			fixation	2020-07-01	ORF1ab	NSP5	89	L
3352	L3352F	L3352F	L3352F	paraFix	2021-01-15	ORF1ab	NSP5	89	L
3352	L3352F			fixation	2021-07-01	ORF1ab	NSP5	89	L
3352	L3352F			fixation	2021-03-16	ORF1ab	NSP5	89	L
3352	L3352F			fixation	2021-01-01	ORF1ab	NSP5	89	L
3352	L3352F			fixation	2020-10-15	ORF1ab	NSP5	89	L
3352	L3352F			fixation	2021-06-02	ORF1ab	NSP5	89	L
3352	L3352F			fixation	2021-03-01	ORF1ab	NSP5	89	L
3352	L3352F			fixation	2021-05-17	ORF1ab	NSP5	89	L
3352	L3352F			fixation	2020-12-15	ORF1ab	NSP5	89	L
3352	L3352F			fixation	2021-06-15	ORF1ab	NSP5	89	L
3353		K3353R, K3353N		parallel	2021-03-16	ORF1ab	NSP5	90	K
3353	K3353R	K3353R	K3353R	paraFix	2021-06-15	ORF1ab	NSP5	90	K
3353	K3353R	K3353R	K3353R	paraFix	2021-01-01	ORF1ab	NSP5	90	K
3353	K3353R	K3353R, R3353K	K3353R	paraFix	2021-05-17	ORF1ab	NSP5	90	K
3353		K3353R, K3353N		parallel	2020-10-01	ORF1ab	NSP5	90	K
3353	K3353R	K3353R	K3353R	paraFix	2021-02-01	ORF1ab	NSP5	90	K
3353	K3353R	K3353R, R3353K	K3353R	paraFix	2021-04-02	ORF1ab	NSP5	90	K
3353	K3353R	K3353R	K3353R	paraFix	2021-03-01	ORF1ab	NSP5	90	K
3353	K3353R	K3353R, R3353K	K3353R	paraFix	2021-01-15	ORF1ab	NSP5	90	K
3353		K3353R, K3353N		parallel	2020-12-01	ORF1ab	NSP5	90	K
3353		K3353R		parallel	2020-07-31	ORF1ab	NSP5	90	K
3353		K3353R		parallel	2020-11-02	ORF1ab	NSP5	90	K
3353	K3353R	K3353R	K3353R	paraFix	2021-04-30	ORF1ab	NSP5	90	K
3353		K3353R		parallel	2020-11-16	ORF1ab	NSP5	90	K
3353	K3353R	K3353R	K3353R	paraFix	2021-06-02	ORF1ab	NSP5	90	K
3353	K3353R	K3353R	K3353R	paraFix	2021-07-01	ORF1ab	NSP5	90	K
3353	K3353R	R3353K, K3353R	K3353R	paraFix	2021-04-15	ORF1ab	NSP5	90	K
3353	K3353R	K3353R	K3353R	paraFix	2021-02-15	ORF1ab	NSP5	90	K
3353		K3353R		parallel	2020-09-15	ORF1ab	NSP5	90	K
3353	K3353R	K3353R	K3353R	paraFix	2020-12-15	ORF1ab	NSP5	90	K
3359		P3359S, P3359L		parallel	2021-07-01	ORF1ab	NSP5	96	P
3359		P3359S, P3359L		parallel	2021-05-17	ORF1ab	NSP5	96	P
3359	P3359S			fixation	2021-02-15	ORF1ab	NSP5	96	P
3359	P3359S			fixation	2021-03-01	ORF1ab	NSP5	96	P
3359	P3359S			fixation	2021-01-15	ORF1ab	NSP5	96	P
3359		P3359S, P3359L		parallel	2021-06-02	ORF1ab	NSP5	96	P
3359	P3359S			fixation	2021-04-30	ORF1ab	NSP5	96	P
3359		P3359L, P3359S		parallel	2020-12-15	ORF1ab	NSP5	96	P
3371		P3371S, P3371L		parallel	2020-11-16	ORF1ab	NSP5	108	P
3371		P3371S, P3371L		parallel	2021-05-17	ORF1ab	NSP5	108	P
3371	P3371S	P3371L, P3371S	P3371S	paraFix	2020-12-01	ORF1ab	NSP5	108	P
3371		P3371L, P3371S		parallel	2021-04-02	ORF1ab	NSP5	108	P
3371		P3371S, P3371L		parallel	2021-02-01	ORF1ab	NSP5	108	P
3371		P3371S		parallel	2021-04-15	ORF1ab	NSP5	108	P
3447		P3447S		parallel	2020-07-31	ORF1ab	NSP5	184	P
3447		P3447S		parallel	2020-07-15	ORF1ab	NSP5	184	P
3468	L3468V			fixation	2021-02-15	ORF1ab	NSP5	205	L
3468	L3468V			fixation	2021-03-16	ORF1ab	NSP5	205	L
3468	L3468V			fixation	2021-01-01	ORF1ab	NSP5	205	L
3468	L3468V			fixation	2021-06-15	ORF1ab	NSP5	205	L
3468	L3468V			fixation	2021-04-15	ORF1ab	NSP5	205	L
3468	L3468V			fixation	2021-03-01	ORF1ab	NSP5	205	L
3468	L3468V			fixation	2021-01-15	ORF1ab	NSP5	205	L
3468	L3468V			fixation	2021-06-02	ORF1ab	NSP5	205	L
3468	L3468V			fixation	2021-05-17	ORF1ab	NSP5	205	L
3468	L3468V			fixation	2021-04-30	ORF1ab	NSP5	205	L
3468	L3468V			fixation	2021-02-01	ORF1ab	NSP5	205	L
3468	L3468V			fixation	2021-07-01	ORF1ab	NSP5	205	L
3497		A3497V		parallel	2020-11-16	ORF1ab	NSP5	234	A
3504		P3504S, P3504H, P3504L		parallel	2021-06-02	ORF1ab	NSP5	241	P
3573		K3573R, K3573E		parallel	2021-07-01	ORF1ab	NSP6	4	K
3580	H3580Q	H3580Q	H3580Q	paraFix	2021-06-02	ORF1ab	NSP6	11	H
3580	H3580Q	H3580Q	H3580Q	paraFix	2021-06-15	ORF1ab	NSP6	11	H
3580	H3580Q			fixation	2021-05-17	ORF1ab	NSP6	11	H
3585	L3585I			fixation	2021-01-15	ORF1ab	NSP6	16	L
3606	L3606F	L3606F, F3606L	L3606F	paraFix	2020-10-01	ORF1ab	NSP6	37	L
3606	L3606F	L3606F, F3606L	L3606F	paraFix	2020-06-15	ORF1ab	NSP6	37	L
3606	L3606F	L3606F, F3606L, L3606W	L3606F	paraFix	2020-11-16	ORF1ab	NSP6	37	L
3606	L3606F	L3606F, F3606L	L3606F	paraFix	2021-06-02	ORF1ab	NSP6	37	L
3606	L3606F	L3606F, F3606L	L3606F	paraFix	2020-11-02	ORF1ab	NSP6	37	L
3606	L3606F	L3606F, F3606L	L3606F	paraFix	2021-01-15	ORF1ab	NSP6	37	L
3606	L3606F	F3606L, L3606F	L3606F	paraFix	2020-12-01	ORF1ab	NSP6	37	L
3606	F3606L, L3606F	L3606F, F3606L	L3606F, F3606L	paraFix	2021-02-15	ORF1ab	NSP6	37	L
3606	L3606F, F3606L	L3606F, F3606L	L3606F, F3606L	paraFix	2021-03-16	ORF1ab	NSP6	37	L
3606	L3606F	L3606F	L3606F	paraFix	2021-02-01	ORF1ab	NSP6	37	L
3606	L3606F	L3606F, F3606L	L3606F	paraFix	2021-01-01	ORF1ab	NSP6	37	L
3606	L3606F	L3606F, F3606L	L3606F	paraFix	2021-04-15	ORF1ab	NSP6	37	L
3606	L3606F	L3606F, F3606L	L3606F	paraFix	2020-06-01	ORF1ab	NSP6	37	L
3606	L3606F	L3606F, F3606L	L3606F	paraFix	2020-12-15	ORF1ab	NSP6	37	L
3606	L3606F	L3606F, F3606L	L3606F	paraFix	2020-10-15	ORF1ab	NSP6	37	L
3606	L3606F	L3606F, F3606L	L3606F	paraFix	2020-07-01	ORF1ab	NSP6	37	L
3606	L3606F	L3606F	L3606F	paraFix	2021-06-15	ORF1ab	NSP6	37	L
3606	L3606F	L3606F, F3606L	L3606F	paraFix	2021-05-17	ORF1ab	NSP6	37	L
3606	L3606F	L3606F, F3606L	L3606F	paraFix	2020-07-15	ORF1ab	NSP6	37	L
3606	L3606F	L3606F, F3606L	L3606F	paraFix	2020-09-15	ORF1ab	NSP6	37	L
3606	L3606F, F3606L	L3606F, F3606L	L3606F, F3606L	paraFix	2021-04-02	ORF1ab	NSP6	37	L
3606	L3606F	L3606F	L3606F	paraFix	2021-04-30	ORF1ab	NSP6	37	L
3606	L3606F	L3606F, F3606L	L3606F	paraFix	2020-08-14	ORF1ab	NSP6	37	L
3606	L3606F	L3606F, F3606L	L3606F	paraFix	2021-07-01	ORF1ab	NSP6	37	L
3606	L3606F	L3606F, F3606L	L3606F	paraFix	2020-07-31	ORF1ab	NSP6	37	L
3606	L3606F	L3606F, F3606L	L3606F	paraFix	2021-03-01	ORF1ab	NSP6	37	L
3606	L3606F	L3606F, F3606L	L3606F	paraFix	2020-09-01	ORF1ab	NSP6	37	L
3615	A3615V			fixation	2021-04-15	ORF1ab	NSP6	46	A
3615	A3615V			fixation	2020-07-01	ORF1ab	NSP6	46	A
3615	A3615V			fixation	2020-10-01	ORF1ab	NSP6	46	A
3615	A3615V			fixation	2020-07-31	ORF1ab	NSP6	46	A
3615		A3615V		parallel	2021-03-01	ORF1ab	NSP6	46	A
3615	A3615V			fixation	2020-09-15	ORF1ab	NSP6	46	A
3615	A3615V			fixation	2020-06-15	ORF1ab	NSP6	46	A
3615	A3615V			fixation	2020-07-15	ORF1ab	NSP6	46	A
3615		A3615V		parallel	2021-01-01	ORF1ab	NSP6	46	A
3615	A3615V			fixation	2020-09-01	ORF1ab	NSP6	46	A
3615	A3615V			fixation	2020-08-14	ORF1ab	NSP6	46	A
3618	I3618V			fixation	2021-06-02	ORF1ab	NSP6	49	I
3618	I3618V			fixation	2021-06-15	ORF1ab	NSP6	49	I
3618	I3618V	I3618V	I3618V	paraFix	2021-04-02	ORF1ab	NSP6	49	I
3618	I3618V			fixation	2021-04-30	ORF1ab	NSP6	49	I
3618	I3618V			fixation	2021-05-17	ORF1ab	NSP6	49	I
3618	I3618V	V3618I, I3618V	I3618V	paraFix	2021-07-01	ORF1ab	NSP6	49	I
3618	I3618V	I3618V	I3618V	paraFix	2021-04-15	ORF1ab	NSP6	49	I
3618	I3618V			fixation	2021-03-16	ORF1ab	NSP6	49	I
3618		I3618V		parallel	2021-01-15	ORF1ab	NSP6	49	I
3621		M3621I		parallel	2021-04-02	ORF1ab	NSP6	52	M
3623	A3623S			fixation	2021-02-01	ORF1ab	NSP6	54	A
3623	A3623S			fixation	2021-01-15	ORF1ab	NSP6	54	A
3623	A3623S			fixation	2021-02-15	ORF1ab	NSP6	54	A
3644	L3644F			fixation	2021-06-02	ORF1ab	NSP6	75	L
3644	L3644F			fixation	2021-06-15	ORF1ab	NSP6	75	L
3644	L3644F	L3644F	L3644F	paraFix	2021-07-01	ORF1ab	NSP6	75	L
3646	T3646A			fixation	2021-06-02	ORF1ab	NSP6	77	T
3646	T3646A, A3646T			fixation	2021-05-17	ORF1ab	NSP6	77	T
3646	T3646A			fixation	2021-07-01	ORF1ab	NSP6	77	T
3646	T3646A	T3646A	T3646A	paraFix	2021-06-15	ORF1ab	NSP6	77	T
3653		V3653F		parallel	2021-03-16	ORF1ab	NSP6	84	V
3653		V3653F		parallel	2021-06-02	ORF1ab	NSP6	84	V
3653		V3653F		parallel	2021-04-02	ORF1ab	NSP6	84	V
3653		V3653F		parallel	2021-03-01	ORF1ab	NSP6	84	V
3653		V3653F		parallel	2021-04-15	ORF1ab	NSP6	84	V
3653		V3653F		parallel	2021-04-30	ORF1ab	NSP6	84	V
3655		M3655I		parallel	2021-01-15	ORF1ab	NSP6	86	M
3655	M3655I			fixation	2021-02-15	ORF1ab	NSP6	86	M
3655	M3655I			fixation	2021-04-02	ORF1ab	NSP6	86	M
3655	M3655I	M3655I	M3655I	paraFix	2021-03-16	ORF1ab	NSP6	86	M
3655	M3655I	M3655I, M3655V	M3655I	paraFix	2021-05-17	ORF1ab	NSP6	86	M
3655	M3655I			fixation	2021-06-15	ORF1ab	NSP6	86	M
3655	M3655I			fixation	2021-06-02	ORF1ab	NSP6	86	M
3655	M3655I			fixation	2021-04-15	ORF1ab	NSP6	86	M
3655		M3655I		parallel	2021-01-01	ORF1ab	NSP6	86	M
3655	M3655I			fixation	2021-04-30	ORF1ab	NSP6	86	M
3655		M3655I		parallel	2020-12-15	ORF1ab	NSP6	86	M
3655	M3655I			fixation	2021-03-01	ORF1ab	NSP6	86	M
3655		M3655I, M3655V		parallel	2020-09-01	ORF1ab	NSP6	86	M
3667	L3667F			fixation	2021-04-30	ORF1ab	NSP6	98	L
3667	L3667F			fixation	2021-05-17	ORF1ab	NSP6	98	L
3667	L3667F			fixation	2021-03-16	ORF1ab	NSP6	98	L
3667	L3667F			fixation	2021-06-15	ORF1ab	NSP6	98	L
3667	L3667F			fixation	2021-02-15	ORF1ab	NSP6	98	L
3667	L3667F			fixation	2021-04-02	ORF1ab	NSP6	98	L
3667	L3667F			fixation	2021-03-01	ORF1ab	NSP6	98	L
3667	L3667F			fixation	2021-04-15	ORF1ab	NSP6	98	L
3677		F3677L		parallel	2021-04-02	ORF1ab	NSP6	108	F
3718	V3718A	V3718F, V3718A	V3718A	paraFix	2021-06-02	ORF1ab	NSP6	149	V
3718	V3718F	V3718A, V3718F	V3718F	paraFix	2021-01-15	ORF1ab	NSP6	149	V
3718	V3718A	V3718A, A3718V, V3718F, V3718I	V3718A	paraFix	2021-07-01	ORF1ab	NSP6	149	V
3718	V3718A, V3718F	V3718A, V3718F	V3718A, V3718F	paraFix	2021-05-17	ORF1ab	NSP6	149	V
3718		V3718F, V3718A		parallel	2021-03-01	ORF1ab	NSP6	149	V
3718		V3718F, V3718A		parallel	2021-03-16	ORF1ab	NSP6	149	V
3718		V3718F, V3718A		parallel	2020-12-15	ORF1ab	NSP6	149	V
3718	V3718A, V3718F	V3718A, V3718F	V3718A, V3718F	paraFix	2021-06-15	ORF1ab	NSP6	149	V
3718	V3718F	V3718F, V3718A	V3718F	paraFix	2021-04-15	ORF1ab	NSP6	149	V
3718		V3718F, V3718A		parallel	2021-02-01	ORF1ab	NSP6	149	V
3718	V3718F	V3718F, V3718A	V3718F	paraFix	2021-04-02	ORF1ab	NSP6	149	V
3718		V3718F, V3718A		parallel	2021-01-01	ORF1ab	NSP6	149	V
3718		V3718F, V3718A		parallel	2021-02-15	ORF1ab	NSP6	149	V
3718	V3718F	V3718F, V3718A	V3718F	paraFix	2021-04-30	ORF1ab	NSP6	149	V
3728	D3728N			fixation	2021-01-15	ORF1ab	NSP6	159	D
3728	D3728N			fixation	2020-12-01	ORF1ab	NSP6	159	D
3729		Q3729R		parallel	2021-02-01	ORF1ab	NSP6	160	Q
3729		Q3729R, Q3729K		parallel	2021-07-01	ORF1ab	NSP6	160	Q
3729		Q3729R, Q3729K		parallel	2021-05-17	ORF1ab	NSP6	160	Q
3729		Q3729R		parallel	2021-03-16	ORF1ab	NSP6	160	Q
3729		Q3729R		parallel	2021-06-15	ORF1ab	NSP6	160	Q
3729		Q3729R, Q3729K		parallel	2021-06-02	ORF1ab	NSP6	160	Q
3729		Q3729R		parallel	2021-04-02	ORF1ab	NSP6	160	Q
3750		T3750I		parallel	2021-03-01	ORF1ab	NSP6	181	T
3750		T3750I		parallel	2021-04-15	ORF1ab	NSP6	181	T
3750	T3750I, I3750T	T3750I, I3750T	T3750I, I3750T	paraFix	2021-06-15	ORF1ab	NSP6	181	T
3750		T3750I		parallel	2021-06-02	ORF1ab	NSP6	181	T
3750	T3750I	T3750I, I3750T	T3750I	paraFix	2021-07-01	ORF1ab	NSP6	181	T
3750		T3750I, T3750A		parallel	2021-05-17	ORF1ab	NSP6	181	T
3752	M3752I	M3752I	M3752I	paraFix	2021-04-15	ORF1ab	NSP6	183	M
3752	M3752I			fixation	2021-02-15	ORF1ab	NSP6	183	M
3752	M3752I			fixation	2021-04-30	ORF1ab	NSP6	183	M
3752		M3752I		parallel	2021-06-02	ORF1ab	NSP6	183	M
3752	M3752I	M3752I	M3752I	paraFix	2021-03-01	ORF1ab	NSP6	183	M
3752	M3752I			fixation	2021-06-15	ORF1ab	NSP6	183	M
3752	M3752I			fixation	2021-04-02	ORF1ab	NSP6	183	M
3752	M3752I	M3752I, I3752M	M3752I	paraFix	2021-05-17	ORF1ab	NSP6	183	M
3829		L3829F		parallel	2021-04-30	ORF1ab	NSP6	260	L
3829		L3829F		parallel	2021-06-15	ORF1ab	NSP6	260	L
3829	L3829F	L3829F, F3829L	L3829F	paraFix	2021-06-02	ORF1ab	NSP6	260	L
3829		L3829F		parallel	2021-03-01	ORF1ab	NSP6	260	L
3829		L3829F		parallel	2021-04-15	ORF1ab	NSP6	260	L
3829		L3829F		parallel	2021-07-01	ORF1ab	NSP6	260	L
3862		M3862I		parallel	2020-12-15	ORF1ab	NSP7	3	M
3884	S3884L			fixation	2020-07-15	ORF1ab	NSP7	25	S
3884	S3884L			fixation	2021-01-01	ORF1ab	NSP7	25	S
3884	S3884L, L3884S	S3884L, L3884S	S3884L, L3884S	paraFix	2021-05-17	ORF1ab	NSP7	25	S
3884	S3884L			fixation	2021-04-30	ORF1ab	NSP7	25	S
3884	S3884L			fixation	2021-02-15	ORF1ab	NSP7	25	S
3884	S3884L			fixation	2020-09-15	ORF1ab	NSP7	25	S
3884	S3884L			fixation	2021-04-02	ORF1ab	NSP7	25	S
3884	S3884L			fixation	2020-09-01	ORF1ab	NSP7	25	S
3884	S3884L			fixation	2020-11-16	ORF1ab	NSP7	25	S
3884	S3884L	S3884L	S3884L	paraFix	2021-07-01	ORF1ab	NSP7	25	S
3884	S3884L	S3884L	S3884L	paraFix	2020-10-15	ORF1ab	NSP7	25	S
3884	S3884L			fixation	2020-07-01	ORF1ab	NSP7	25	S
3884	S3884L			fixation	2021-04-15	ORF1ab	NSP7	25	S
3884	S3884L	S3884L	S3884L	paraFix	2020-12-15	ORF1ab	NSP7	25	S
3884	S3884L	S3884L, L3884S	S3884L	paraFix	2020-12-01	ORF1ab	NSP7	25	S
3884	S3884L			fixation	2020-11-02	ORF1ab	NSP7	25	S
3884	S3884L			fixation	2020-08-14	ORF1ab	NSP7	25	S
3884	S3884L			fixation	2020-07-31	ORF1ab	NSP7	25	S
3884	S3884L	S3884L	S3884L	paraFix	2021-06-15	ORF1ab	NSP7	25	S
3884	S3884L			fixation	2021-06-02	ORF1ab	NSP7	25	S
3884	S3884L			fixation	2020-10-01	ORF1ab	NSP7	25	S
3884	S3884L			fixation	2021-01-15	ORF1ab	NSP7	25	S
3884	S3884L			fixation	2021-02-01	ORF1ab	NSP7	25	S
3884	S3884L			fixation	2021-03-16	ORF1ab	NSP7	25	S
3884	S3884L			fixation	2020-06-01	ORF1ab	NSP7	25	S
3930	L3930F	L3930F	L3930F	paraFix	2021-04-15	ORF1ab	NSP7	71	L
3930	L3930F			fixation	2021-04-02	ORF1ab	NSP7	71	L
3930	L3930F			fixation	2021-06-02	ORF1ab	NSP7	71	L
3930	L3930F	L3930F	L3930F	paraFix	2021-05-17	ORF1ab	NSP7	71	L
3930	L3930F			fixation	2021-06-15	ORF1ab	NSP7	71	L
3930	L3930F, F3930L			fixation	2021-04-30	ORF1ab	NSP7	71	L
3930	L3930F	L3930F	L3930F	paraFix	2021-03-01	ORF1ab	NSP7	71	L
3930	L3930F			fixation	2021-01-15	ORF1ab	NSP7	71	L
3930	L3930F			fixation	2021-02-15	ORF1ab	NSP7	71	L
3930	L3930F	L3930F	L3930F	paraFix	2021-07-01	ORF1ab	NSP7	71	L
3930	L3930F			fixation	2021-02-01	ORF1ab	NSP7	71	L
3930	L3930F			fixation	2021-03-16	ORF1ab	NSP7	71	L
3930	L3930F			fixation	2020-11-02	ORF1ab	NSP7	71	L
3930	L3930F			fixation	2021-01-01	ORF1ab	NSP7	71	L
3966	Q3966R			fixation	2021-05-17	ORF1ab	NSP8	24	Q
3966	Q3966R, R3966Q			fixation	2021-06-02	ORF1ab	NSP8	24	Q
3966	Q3966R			fixation	2021-06-15	ORF1ab	NSP8	24	Q
3966	Q3966R, R3966Q			fixation	2021-04-30	ORF1ab	NSP8	24	Q
3966	Q3966R, R3966Q			fixation	2021-07-01	ORF1ab	NSP8	24	Q
3976		V3976F		parallel	2020-11-16	ORF1ab	NSP8	34	V
3976		V3976F		parallel	2021-03-01	ORF1ab	NSP8	34	V
3993		R3993C, R3993H, R3993L		parallel	2020-11-16	ORF1ab	NSP8	51	R
3993		R3993L, R3993H, R3993C		parallel	2021-02-01	ORF1ab	NSP8	51	R
3993		R3993C, R3993L		parallel	2021-01-15	ORF1ab	NSP8	51	R
3993		R3993C		parallel	2020-12-01	ORF1ab	NSP8	51	R
4065		T4065I		parallel	2021-06-15	ORF1ab	NSP8	123	T
4080	Y4080H			fixation	2021-01-01	ORF1ab	NSP8	138	Y
4080	Y4080H			fixation	2020-11-16	ORF1ab	NSP8	138	Y
4080	Y4080H			fixation	2020-12-15	ORF1ab	NSP8	138	Y
4080	Y4080H			fixation	2020-12-01	ORF1ab	NSP8	138	Y
4080	Y4080H			fixation	2021-01-15	ORF1ab	NSP8	138	Y
4083		T4083M		parallel	2021-03-01	ORF1ab	NSP8	141	T
4083		T4083M, T4083A		parallel	2021-01-15	ORF1ab	NSP8	141	T
4083	T4083M			fixation	2020-09-01	ORF1ab	NSP8	141	T
4083		T4083M		parallel	2021-03-16	ORF1ab	NSP8	141	T
4087		T4087I		parallel	2021-04-02	ORF1ab	NSP8	145	T
4087		T4087I, T4087A		parallel	2020-12-01	ORF1ab	NSP8	145	T
4087		T4087I, T4087A		parallel	2020-12-15	ORF1ab	NSP8	145	T
4087		T4087I		parallel	2021-03-16	ORF1ab	NSP8	145	T
4087		T4087I		parallel	2021-04-30	ORF1ab	NSP8	145	T
4087		T4087I		parallel	2021-07-01	ORF1ab	NSP8	145	T
4087		T4087I		parallel	2021-04-15	ORF1ab	NSP8	145	T
4087		T4087I		parallel	2021-05-17	ORF1ab	NSP8	145	T
4090		T4090I, T4090A		parallel	2020-11-16	ORF1ab	NSP8	148	T
4090		T4090I, T4090A		parallel	2020-12-15	ORF1ab	NSP8	148	T
4090	T4090I			fixation	2021-02-15	ORF1ab	NSP8	148	T
4090	T4090I	T4090I, T4090A	T4090I	paraFix	2021-02-01	ORF1ab	NSP8	148	T
4175	T4175I	T4175I	T4175I	paraFix	2021-03-16	ORF1ab	NSP9	35	T
4175	T4175I	T4175I	T4175I	paraFix	2021-04-02	ORF1ab	NSP9	35	T
4175	T4175I	T4175I	T4175I	paraFix	2021-04-15	ORF1ab	NSP9	35	T
4175	T4175I	T4175I	T4175I	paraFix	2021-05-17	ORF1ab	NSP9	35	T
4175	T4175I	I4175T, T4175I	T4175I	paraFix	2021-06-15	ORF1ab	NSP9	35	T
4175		T4175I		parallel	2021-02-15	ORF1ab	NSP9	35	T
4175	T4175I	T4175I	T4175I	paraFix	2021-04-30	ORF1ab	NSP9	35	T
4175	T4175I	T4175I, I4175T	T4175I	paraFix	2021-06-02	ORF1ab	NSP9	35	T
4175	T4175I	I4175T, T4175I	T4175I	paraFix	2021-07-01	ORF1ab	NSP9	35	T
4175		T4175I		parallel	2021-03-01	ORF1ab	NSP9	35	T
4177		G4177E, G4177R		parallel	2020-12-01	ORF1ab	NSP9	37	G
4182		L4182F		parallel	2021-02-01	ORF1ab	NSP9	42	L
4182		L4182F		parallel	2021-04-15	ORF1ab	NSP9	42	L
4205	I4205V			fixation	2021-04-30	ORF1ab	NSP9	65	I
4205	I4205V			fixation	2021-04-15	ORF1ab	NSP9	65	I
4205	I4205V			fixation	2021-06-15	ORF1ab	NSP9	65	I
4241	M4241I			fixation	2021-05-17	ORF1ab	NSP9	101	M
4241	M4241I			fixation	2021-01-15	ORF1ab	NSP9	101	M
4241	M4241I			fixation	2021-04-30	ORF1ab	NSP9	101	M
4241	M4241I			fixation	2021-06-15	ORF1ab	NSP9	101	M
4241	M4241I			fixation	2021-04-02	ORF1ab	NSP9	101	M
4241	M4241I	M4241I	M4241I	paraFix	2021-03-01	ORF1ab	NSP9	101	M
4241	M4241I			fixation	2021-02-01	ORF1ab	NSP9	101	M
4241	M4241I			fixation	2021-02-15	ORF1ab	NSP9	101	M
4241	M4241I			fixation	2021-03-16	ORF1ab	NSP9	101	M
4241	M4241I			fixation	2021-04-15	ORF1ab	NSP9	101	M
4285		A4285V, A4285T		parallel	2021-04-02	ORF1ab	NSP10	32	A
4285		A4285V		parallel	2021-02-15	ORF1ab	NSP10	32	A
4285		A4285T, A4285V		parallel	2021-05-17	ORF1ab	NSP10	32	A
4357		A4357V		parallel	2021-01-15	ORF1ab	NSP10	104	A
4430		Y4430H		parallel	2021-02-15	ORF1ab	NSP12	38	Y
4483		K4483R, K4483E		parallel	2021-03-01	ORF1ab	NSP12	91	K
4483		K4483R		parallel	2021-02-15	ORF1ab	NSP12	91	K
4483		K4483R		parallel	2021-02-01	ORF1ab	NSP12	91	K
4489	A4489V			fixation	2021-02-01	ORF1ab	NSP12	97	A
4489	A4489V	A4489V, V4489A	A4489V	paraFix	2020-11-02	ORF1ab	NSP12	97	A
4489	A4489V			fixation	2021-04-15	ORF1ab	NSP12	97	A
4489	A4489V			fixation	2020-07-01	ORF1ab	NSP12	97	A
4489	A4489V			fixation	2020-08-14	ORF1ab	NSP12	97	A
4489	A4489V			fixation	2020-07-15	ORF1ab	NSP12	97	A
4489	A4489V	A4489V	A4489V	paraFix	2020-12-01	ORF1ab	NSP12	97	A
4489	A4489V	A4489V	A4489V	paraFix	2021-04-02	ORF1ab	NSP12	97	A
4489	A4489V	A4489V	A4489V	paraFix	2020-09-15	ORF1ab	NSP12	97	A
4489	A4489V	A4489V	A4489V	paraFix	2021-03-01	ORF1ab	NSP12	97	A
4489	A4489V	A4489V	A4489V	paraFix	2020-10-15	ORF1ab	NSP12	97	A
4489	A4489V			fixation	2020-06-15	ORF1ab	NSP12	97	A
4489	A4489V	A4489V	A4489V	paraFix	2020-06-01	ORF1ab	NSP12	97	A
4489	A4489V			fixation	2021-03-16	ORF1ab	NSP12	97	A
4489	A4489V	A4489V	A4489V	paraFix	2020-11-16	ORF1ab	NSP12	97	A
4489	A4489V	A4489V	A4489V	paraFix	2020-10-01	ORF1ab	NSP12	97	A
4489	A4489V			fixation	2021-06-15	ORF1ab	NSP12	97	A
4489	A4489V	A4489V, V4489A	A4489V	paraFix	2020-09-01	ORF1ab	NSP12	97	A
4489	A4489V			fixation	2020-12-15	ORF1ab	NSP12	97	A
4489	A4489V			fixation	2021-01-01	ORF1ab	NSP12	97	A
4489	A4489V	A4489V, V4489A	A4489V	paraFix	2021-07-01	ORF1ab	NSP12	97	A
4489	A4489V			fixation	2021-06-02	ORF1ab	NSP12	97	A
4489	A4489V			fixation	2021-05-17	ORF1ab	NSP12	97	A
4489	A4489V			fixation	2021-04-30	ORF1ab	NSP12	97	A
4489	A4489V			fixation	2021-01-15	ORF1ab	NSP12	97	A
4489	A4489V			fixation	2021-02-15	ORF1ab	NSP12	97	A
4489	A4489V			fixation	2020-07-31	ORF1ab	NSP12	97	A
4577	A4577S			fixation	2021-02-15	ORF1ab	NSP12	185	A
4577	A4577S			fixation	2021-01-15	ORF1ab	NSP12	185	A
4577	A4577S			fixation	2021-05-17	ORF1ab	NSP12	185	A
4577	A4577S			fixation	2021-02-01	ORF1ab	NSP12	185	A
4577	A4577S			fixation	2021-01-01	ORF1ab	NSP12	185	A
4577	A4577S			fixation	2021-06-02	ORF1ab	NSP12	185	A
4577	A4577S			fixation	2021-04-15	ORF1ab	NSP12	185	A
4577	A4577S	A4577V, A4577S, S4577A	A4577S	paraFix	2021-04-30	ORF1ab	NSP12	185	A
4577	A4577S			fixation	2021-03-16	ORF1ab	NSP12	185	A
4577	A4577S			fixation	2021-04-02	ORF1ab	NSP12	185	A
4577	A4577S			fixation	2021-06-15	ORF1ab	NSP12	185	A
4577	A4577S			fixation	2020-11-16	ORF1ab	NSP12	185	A
4577	A4577S			fixation	2020-12-15	ORF1ab	NSP12	185	A
4577	A4577S	S4577A, A4577S, A4577V	A4577S	paraFix	2021-03-01	ORF1ab	NSP12	185	A
4577	A4577S			fixation	2020-12-01	ORF1ab	NSP12	185	A
4619		P4619L		parallel	2021-01-15	ORF1ab	NSP12	227	P
4619		P4619L, P4619S		parallel	2021-03-01	ORF1ab	NSP12	227	P
4619	P4619L	P4619S, P4619L	P4619L	paraFix	2021-07-01	ORF1ab	NSP12	227	P
4619	P4619L	P4619L	P4619L	paraFix	2021-06-02	ORF1ab	NSP12	227	P
4619		P4619L		parallel	2021-02-01	ORF1ab	NSP12	227	P
4619	P4619L	P4619L	P4619L	paraFix	2021-05-17	ORF1ab	NSP12	227	P
4619	P4619L	P4619L, P4619S	P4619L	paraFix	2021-02-15	ORF1ab	NSP12	227	P
4619		P4619L		parallel	2020-11-16	ORF1ab	NSP12	227	P
4619	P4619L, L4619P	P4619L, L4619P	P4619L, L4619P	paraFix	2021-04-02	ORF1ab	NSP12	227	P
4619	P4619L	P4619L, P4619S	P4619L	paraFix	2021-03-16	ORF1ab	NSP12	227	P
4619	P4619L	P4619L	P4619L	paraFix	2021-06-15	ORF1ab	NSP12	227	P
4619	P4619L	P4619L	P4619L	paraFix	2021-04-15	ORF1ab	NSP12	227	P
4619	P4619L	P4619L	P4619L	paraFix	2021-04-30	ORF1ab	NSP12	227	P
4621		S4621G, S4621N		parallel	2021-07-01	ORF1ab	NSP12	229	S
4649		V4649F		parallel	2020-11-16	ORF1ab	NSP12	257	V
4656		P4656T, P4656S		parallel	2020-11-16	ORF1ab	NSP12	264	P
4694	L4694S			fixation	2021-03-01	ORF1ab	NSP12	302	L
4715	P4715L	L4715P, L4715F		paraFix	2021-03-01	ORF1ab	NSP12	323	P
4715	P4715L			fixation	2020-06-01	ORF1ab	NSP12	323	P
4715	P4715L			fixation	2021-01-15	ORF1ab	NSP12	323	P
4715	P4715L			fixation	2020-09-15	ORF1ab	NSP12	323	P
4715	P4715L	L4715P		paraFix	2020-11-02	ORF1ab	NSP12	323	P
4715	P4715L, L4715F	P4715L, F4715L, L4715F, L4715H, L4715P	P4715L, L4715F	paraFix	2021-06-15	ORF1ab	NSP12	323	P
4715	P4715L, L4715F	L4715P, F4715L, L4715F	L4715F	paraFix	2021-04-30	ORF1ab	NSP12	323	P
4715	P4715L, L4715P			fixation	2020-10-15	ORF1ab	NSP12	323	P
4715	P4715L			fixation	2020-07-01	ORF1ab	NSP12	323	P
4715	P4715L	L4715P, P4715L, L4715F	P4715L	paraFix	2020-11-16	ORF1ab	NSP12	323	P
4715	P4715L			fixation	2021-04-02	ORF1ab	NSP12	323	P
4715	P4715L			fixation	2020-09-01	ORF1ab	NSP12	323	P
4715	P4715L, L4715F	L4715P, L4715F, L4715H	L4715F	paraFix	2021-07-01	ORF1ab	NSP12	323	P
4715	P4715L			fixation	2020-07-15	ORF1ab	NSP12	323	P
4715	P4715L			fixation	2020-10-01	ORF1ab	NSP12	323	P
4715	P4715L, L4715F	L4715P, L4715H, L4715F	L4715F	paraFix	2021-04-15	ORF1ab	NSP12	323	P
4715	P4715L			fixation	2021-02-15	ORF1ab	NSP12	323	P
4715	P4715L			fixation	2021-01-01	ORF1ab	NSP12	323	P
4715	P4715L, L4715F			fixation	2021-06-02	ORF1ab	NSP12	323	P
4715	P4715L			fixation	2021-02-01	ORF1ab	NSP12	323	P
4715	P4715L			fixation	2020-12-01	ORF1ab	NSP12	323	P
4715	P4715L			fixation	2020-12-15	ORF1ab	NSP12	323	P
4715	P4715L			fixation	2020-08-14	ORF1ab	NSP12	323	P
4715	P4715L			fixation	2020-07-31	ORF1ab	NSP12	323	P
4715	P4715L, L4715F	L4715P, L4715H, L4715F	L4715F	paraFix	2021-05-17	ORF1ab	NSP12	323	P
4715	P4715L	P4715L, L4715P, L4715F	P4715L	paraFix	2021-03-16	ORF1ab	NSP12	323	P
4715	P4715L			fixation	2020-06-15	ORF1ab	NSP12	323	P
4815	A4815V			fixation	2020-12-01	ORF1ab	NSP12	423	A
4841		A4841V		parallel	2020-12-15	ORF1ab	NSP12	449	A
5021		M5021I, M5021T		parallel	2021-05-17	ORF1ab	NSP12	629	M
5058		M5058I		parallel	2021-07-01	ORF1ab	NSP12	666	M
5058		M5058I, M5058T		parallel	2021-04-02	ORF1ab	NSP12	666	M
5058		M5058I		parallel	2020-10-15	ORF1ab	NSP12	666	M
5058	M5058I	M5058I	M5058I	paraFix	2020-11-16	ORF1ab	NSP12	666	M
5058		M5058I, M5058T		parallel	2021-04-30	ORF1ab	NSP12	666	M
5058		M5058I		parallel	2020-12-01	ORF1ab	NSP12	666	M
5058		M5058T, M5058I		parallel	2021-06-15	ORF1ab	NSP12	666	M
5058		M5058I		parallel	2021-01-01	ORF1ab	NSP12	666	M
5058		M5058I		parallel	2020-12-15	ORF1ab	NSP12	666	M
5058		M5058I		parallel	2020-11-02	ORF1ab	NSP12	666	M
5058		M5058I		parallel	2021-01-15	ORF1ab	NSP12	666	M
5058		M5058T, M5058I		parallel	2021-04-15	ORF1ab	NSP12	666	M
5058		M5058T, M5058I		parallel	2021-02-01	ORF1ab	NSP12	666	M
5058		M5058T, M5058I		parallel	2021-03-16	ORF1ab	NSP12	666	M
5058		M5058I		parallel	2020-09-01	ORF1ab	NSP12	666	M
5058		M5058I, M5058T, M5058L		parallel	2021-05-17	ORF1ab	NSP12	666	M
5058		M5058I		parallel	2021-02-15	ORF1ab	NSP12	666	M
5058		M5058I		parallel	2020-09-15	ORF1ab	NSP12	666	M
5058	M5058T	M5058I, M5058T	M5058T	paraFix	2021-03-01	ORF1ab	NSP12	666	M
5063	G5063S	G5063A, G5063V, G5063S	G5063S	paraFix	2021-05-17	ORF1ab	NSP12	671	G
5063	G5063S	G5063A, G5063S	G5063S	paraFix	2021-06-02	ORF1ab	NSP12	671	G
5063	G5063S			fixation	2021-06-15	ORF1ab	NSP12	671	G
5063	G5063S			fixation	2021-07-01	ORF1ab	NSP12	671	G
5112	V5112I			fixation	2021-05-17	ORF1ab	NSP12	720	V
5112	V5112I			fixation	2021-02-15	ORF1ab	NSP12	720	V
5112	V5112I			fixation	2021-04-15	ORF1ab	NSP12	720	V
5112	V5112I			fixation	2021-04-02	ORF1ab	NSP12	720	V
5112	V5112I			fixation	2021-03-01	ORF1ab	NSP12	720	V
5112	V5112I			fixation	2021-01-15	ORF1ab	NSP12	720	V
5112	V5112I			fixation	2021-02-01	ORF1ab	NSP12	720	V
5112	V5112I			fixation	2021-06-15	ORF1ab	NSP12	720	V
5112	V5112I			fixation	2021-04-30	ORF1ab	NSP12	720	V
5112	V5112I			fixation	2021-03-16	ORF1ab	NSP12	720	V
5168	V5168L	V5168L	V5168L	paraFix	2021-05-17	ORF1ab	NSP12	776	V
5168	V5168L	V5168L	V5168L	paraFix	2021-02-15	ORF1ab	NSP12	776	V
5168	V5168L	V5168L	V5168L	paraFix	2021-04-02	ORF1ab	NSP12	776	V
5168	V5168L	V5168L	V5168L	paraFix	2021-04-15	ORF1ab	NSP12	776	V
5168	V5168L	V5168L	V5168L	paraFix	2021-06-15	ORF1ab	NSP12	776	V
5168	V5168L	V5168L	V5168L	paraFix	2021-03-01	ORF1ab	NSP12	776	V
5168	V5168L	V5168L	V5168L	paraFix	2021-02-01	ORF1ab	NSP12	776	V
5168	V5168L	V5168L	V5168L	paraFix	2021-03-16	ORF1ab	NSP12	776	V
5168	V5168L	V5168L	V5168L	paraFix	2021-04-30	ORF1ab	NSP12	776	V
5168	V5168L			fixation	2020-12-01	ORF1ab	NSP12	776	V
5168	V5168L			fixation	2020-11-16	ORF1ab	NSP12	776	V
5168	V5168L	V5168L	V5168L	paraFix	2021-06-02	ORF1ab	NSP12	776	V
5168	V5168L	V5168L	V5168L	paraFix	2021-01-01	ORF1ab	NSP12	776	V
5168	V5168L			fixation	2020-12-15	ORF1ab	NSP12	776	V
5168	V5168L	V5168L	V5168L	paraFix	2021-01-15	ORF1ab	NSP12	776	V
5168		V5168L		parallel	2021-07-01	ORF1ab	NSP12	776	V
5214		Q5214H		parallel	2021-04-02	ORF1ab	NSP12	822	Q
5215	G5215S			fixation	2020-12-15	ORF1ab	NSP12	823	G
5215	G5215S			fixation	2020-10-15	ORF1ab	NSP12	823	G
5215	G5215S			fixation	2020-12-01	ORF1ab	NSP12	823	G
5215	G5215S			fixation	2020-11-16	ORF1ab	NSP12	823	G
5221	L5221F			fixation	2021-06-15	ORF1ab	NSP12	829	L
5240		V5240L		parallel	2020-12-01	ORF1ab	NSP12	848	V
5310	P5310L			fixation	2020-10-15	ORF1ab	NSP12	918	P
5310	P5310L			fixation	2020-09-01	ORF1ab	NSP12	918	P
5310	P5310L			fixation	2020-09-15	ORF1ab	NSP12	918	P
5310	P5310L			fixation	2020-11-02	ORF1ab	NSP12	918	P
5371	P5371L			fixation	2020-07-31	ORF1ab	NSP13	47	P
5371	P5371L			fixation	2020-07-01	ORF1ab	NSP13	47	P
5371		P5371L, P5371S		parallel	2021-04-15	ORF1ab	NSP13	47	P
5377		P5377L		parallel	2021-03-16	ORF1ab	NSP13	53	P
5377	P5377L	P5377L, P5377Q, P5377S	P5377L	paraFix	2021-06-15	ORF1ab	NSP13	53	P
5377		P5377L		parallel	2021-04-02	ORF1ab	NSP13	53	P
5377	P5377L	P5377L	P5377L	paraFix	2021-04-15	ORF1ab	NSP13	53	P
5377		P5377L		parallel	2020-12-15	ORF1ab	NSP13	53	P
5377		P5377L		parallel	2021-07-01	ORF1ab	NSP13	53	P
5377		P5377L		parallel	2020-12-01	ORF1ab	NSP13	53	P
5377	P5377L	P5377L, L5377P	P5377L	paraFix	2021-04-30	ORF1ab	NSP13	53	P
5377		P5377L		parallel	2021-02-15	ORF1ab	NSP13	53	P
5377		P5377L		parallel	2021-06-02	ORF1ab	NSP13	53	P
5377		P5377L		parallel	2021-05-17	ORF1ab	NSP13	53	P
5377		P5377L		parallel	2021-03-01	ORF1ab	NSP13	53	P
5398		S5398P, S5398L		parallel	2021-03-01	ORF1ab	NSP13	74	S
5401	P5401L	P5401L	P5401L	paraFix	2021-05-17	ORF1ab	NSP13	77	P
5401	P5401L	P5401L	P5401L	paraFix	2021-06-02	ORF1ab	NSP13	77	P
5401		P5401L		parallel	2021-04-30	ORF1ab	NSP13	77	P
5401	P5401L	P5401L, L5401P	P5401L	paraFix	2021-06-15	ORF1ab	NSP13	77	P
5401		P5401L		parallel	2021-04-15	ORF1ab	NSP13	77	P
5401	P5401L	P5401L	P5401L	paraFix	2021-07-01	ORF1ab	NSP13	77	P
5412	Q5412H			fixation	2021-06-15	ORF1ab	NSP13	88	Q
5412	Q5412H			fixation	2021-05-17	ORF1ab	NSP13	88	Q
5412	Q5412H			fixation	2021-06-02	ORF1ab	NSP13	88	Q
5530		G5530V, G5530C		parallel	2020-12-01	ORF1ab	NSP13	206	G
5542	K5542R			fixation	2021-02-01	ORF1ab	NSP13	218	K
5542	K5542R			fixation	2021-04-30	ORF1ab	NSP13	218	K
5542	K5542R			fixation	2021-05-17	ORF1ab	NSP13	218	K
5542	K5542R			fixation	2021-04-02	ORF1ab	NSP13	218	K
5542	K5542R			fixation	2021-04-15	ORF1ab	NSP13	218	K
5542	K5542R			fixation	2021-01-15	ORF1ab	NSP13	218	K
5542	K5542R			fixation	2021-03-16	ORF1ab	NSP13	218	K
5542	K5542R			fixation	2020-12-01	ORF1ab	NSP13	218	K
5542	K5542R			fixation	2021-02-15	ORF1ab	NSP13	218	K
5542	K5542R			fixation	2021-06-15	ORF1ab	NSP13	218	K
5542	K5542R			fixation	2021-06-02	ORF1ab	NSP13	218	K
5542	K5542R			fixation	2021-03-01	ORF1ab	NSP13	218	K
5542	K5542R			fixation	2020-12-15	ORF1ab	NSP13	218	K
5542	K5542R			fixation	2020-11-16	ORF1ab	NSP13	218	K
5542	K5542R			fixation	2021-01-01	ORF1ab	NSP13	218	K
5557		M5557I		parallel	2021-03-16	ORF1ab	NSP13	233	M
5563		T5563I		parallel	2021-03-16	ORF1ab	NSP13	239	T
5583	S5583L			fixation	2021-06-02	ORF1ab	NSP13	259	S
5583	S5583L			fixation	2021-07-01	ORF1ab	NSP13	259	S
5583	S5583L			fixation	2021-06-15	ORF1ab	NSP13	259	S
5584	D5584Y			fixation	2021-04-15	ORF1ab	NSP13	260	D
5584	D5584Y	D5584Y	D5584Y	paraFix	2021-06-15	ORF1ab	NSP13	260	D
5584	D5584Y	D5584Y	D5584Y	paraFix	2021-04-30	ORF1ab	NSP13	260	D
5584	D5584Y			fixation	2021-02-15	ORF1ab	NSP13	260	D
5584		D5584Y		parallel	2021-05-17	ORF1ab	NSP13	260	D
5585		E5585D		parallel	2021-07-01	ORF1ab	NSP13	261	E
5585	E5585D			fixation	2021-03-01	ORF1ab	NSP13	261	E
5585	E5585D			fixation	2021-05-17	ORF1ab	NSP13	261	E
5585	E5585D			fixation	2021-04-30	ORF1ab	NSP13	261	E
5585	E5585D			fixation	2021-01-15	ORF1ab	NSP13	261	E
5585	E5585D			fixation	2021-02-01	ORF1ab	NSP13	261	E
5585	E5585D			fixation	2021-02-15	ORF1ab	NSP13	261	E
5585	E5585D	E5585D	E5585D	paraFix	2021-06-02	ORF1ab	NSP13	261	E
5585	E5585D			fixation	2020-12-01	ORF1ab	NSP13	261	E
5585	E5585D			fixation	2021-01-01	ORF1ab	NSP13	261	E
5585	E5585D			fixation	2021-03-16	ORF1ab	NSP13	261	E
5585	E5585D			fixation	2020-11-16	ORF1ab	NSP13	261	E
5585	E5585D			fixation	2020-12-15	ORF1ab	NSP13	261	E
5585	E5585D			fixation	2021-04-15	ORF1ab	NSP13	261	E
5585	E5585D			fixation	2021-04-02	ORF1ab	NSP13	261	E
5585	E5585D	E5585D	E5585D	paraFix	2021-06-15	ORF1ab	NSP13	261	E
5588	S5588I			fixation	2021-02-01	ORF1ab	NSP13	264	S
5614	H5614Y			fixation	2021-03-16	ORF1ab	NSP13	290	H
5614	H5614Y			fixation	2020-12-15	ORF1ab	NSP13	290	H
5614	H5614Y			fixation	2021-02-01	ORF1ab	NSP13	290	H
5614	H5614Y			fixation	2021-01-01	ORF1ab	NSP13	290	H
5614	H5614Y			fixation	2020-09-01	ORF1ab	NSP13	290	H
5614	H5614Y			fixation	2021-04-30	ORF1ab	NSP13	290	H
5614	H5614Y			fixation	2021-06-15	ORF1ab	NSP13	290	H
5614	H5614Y			fixation	2021-06-02	ORF1ab	NSP13	290	H
5614	H5614Y			fixation	2021-02-15	ORF1ab	NSP13	290	H
5614	H5614Y			fixation	2021-05-17	ORF1ab	NSP13	290	H
5614	H5614Y			fixation	2021-04-02	ORF1ab	NSP13	290	H
5614	H5614Y			fixation	2021-01-15	ORF1ab	NSP13	290	H
5614	H5614Y			fixation	2020-12-01	ORF1ab	NSP13	290	H
5614	H5614Y			fixation	2021-04-15	ORF1ab	NSP13	290	H
5614	H5614Y			fixation	2021-03-01	ORF1ab	NSP13	290	H
5614	H5614Y			fixation	2020-11-16	ORF1ab	NSP13	290	H
5620		A5620S		parallel	2021-05-17	ORF1ab	NSP13	296	A
5620		A5620S, A5620T		parallel	2021-03-01	ORF1ab	NSP13	296	A
5620		A5620S		parallel	2021-06-02	ORF1ab	NSP13	296	A
5620		A5620S		parallel	2021-02-01	ORF1ab	NSP13	296	A
5620		A5620S, A5620T		parallel	2021-03-16	ORF1ab	NSP13	296	A
5621		L5621F		parallel	2020-11-16	ORF1ab	NSP13	297	L
5626	A5626D			fixation	2020-07-01	ORF1ab	NSP13	302	A
5665	E5665D			fixation	2021-06-02	ORF1ab	NSP13	341	E
5665	E5665D	E5665D	E5665D	paraFix	2021-03-01	ORF1ab	NSP13	341	E
5665		E5665D		parallel	2021-03-16	ORF1ab	NSP13	341	E
5665		E5665D		parallel	2020-12-15	ORF1ab	NSP13	341	E
5665	E5665D			fixation	2021-06-15	ORF1ab	NSP13	341	E
5665	E5665D			fixation	2021-04-30	ORF1ab	NSP13	341	E
5665	E5665D			fixation	2021-04-15	ORF1ab	NSP13	341	E
5665	E5665D	E5665D	E5665D	paraFix	2021-04-02	ORF1ab	NSP13	341	E
5665		E5665D		parallel	2020-12-01	ORF1ab	NSP13	341	E
5665	E5665D			fixation	2021-05-17	ORF1ab	NSP13	341	E
5665		E5665D		parallel	2021-01-15	ORF1ab	NSP13	341	E
5665	E5665D	E5665D	E5665D	paraFix	2021-02-15	ORF1ab	NSP13	341	E
5665		E5665D		parallel	2021-02-01	ORF1ab	NSP13	341	E
5665	E5665D			fixation	2021-07-01	ORF1ab	NSP13	341	E
5727		A5727V, A5727S		parallel	2021-06-15	ORF1ab	NSP13	403	A
5752	L5752F	L5752F	L5752F	paraFix	2021-02-01	ORF1ab	NSP13	428	L
5752	L5752F	L5752F	L5752F	paraFix	2021-01-15	ORF1ab	NSP13	428	L
5752	L5752F	L5752F	L5752F	paraFix	2021-04-30	ORF1ab	NSP13	428	L
5752	L5752F	L5752F	L5752F	paraFix	2021-02-15	ORF1ab	NSP13	428	L
5752		L5752F		parallel	2021-04-02	ORF1ab	NSP13	428	L
5752	L5752F	L5752F	L5752F	paraFix	2021-01-01	ORF1ab	NSP13	428	L
5752		L5752F		parallel	2021-06-02	ORF1ab	NSP13	428	L
5752		L5752F		parallel	2021-03-16	ORF1ab	NSP13	428	L
5752	L5752F	L5752F	L5752F	paraFix	2021-03-01	ORF1ab	NSP13	428	L
5752		L5752F		parallel	2020-12-15	ORF1ab	NSP13	428	L
5753		M5753I		parallel	2021-05-17	ORF1ab	NSP13	429	M
5753	M5753I			fixation	2021-06-15	ORF1ab	NSP13	429	M
5784	K5784R			fixation	2021-04-30	ORF1ab	NSP13	460	K
5784	K5784R			fixation	2021-04-15	ORF1ab	NSP13	460	K
5784	K5784R	K5784R	K5784R	paraFix	2021-04-02	ORF1ab	NSP13	460	K
5784	K5784R	R5784K, K5784R	K5784R	paraFix	2021-02-15	ORF1ab	NSP13	460	K
5784		K5784R		parallel	2021-03-01	ORF1ab	NSP13	460	K
5784	K5784R, R5784K			fixation	2021-03-16	ORF1ab	NSP13	460	K
5784	K5784R	K5784R	K5784R	paraFix	2021-05-17	ORF1ab	NSP13	460	K
5784	K5784R	K5784R, R5784K	K5784R	paraFix	2021-06-15	ORF1ab	NSP13	460	K
5784		K5784R		parallel	2021-01-15	ORF1ab	NSP13	460	K
5784	K5784R	K5784R	K5784R	paraFix	2021-06-02	ORF1ab	NSP13	460	K
5784	K5784R	K5784R	K5784R	paraFix	2021-07-01	ORF1ab	NSP13	460	K
5784	K5784R, R5784K	K5784R, R5784K	K5784R, R5784K	paraFix	2021-02-01	ORF1ab	NSP13	460	K
5805		T5805M		parallel	2021-03-16	ORF1ab	NSP13	481	T
5805		T5805M		parallel	2021-03-01	ORF1ab	NSP13	481	T
5809	S5809L			fixation	2020-09-15	ORF1ab	NSP13	485	S
5809	S5809L			fixation	2020-09-01	ORF1ab	NSP13	485	S
5809	S5809L			fixation	2020-08-14	ORF1ab	NSP13	485	S
5809	S5809L			fixation	2020-07-31	ORF1ab	NSP13	485	S
5809	S5809L			fixation	2020-07-01	ORF1ab	NSP13	485	S
5828		P5828L, P5828S, P5828H		parallel	2021-04-02	ORF1ab	NSP13	504	P
5828	P5828L			fixation	2020-08-14	ORF1ab	NSP13	504	P
5828	P5828L			fixation	2020-10-15	ORF1ab	NSP13	504	P
5828		P5828L, P5828S		parallel	2021-04-15	ORF1ab	NSP13	504	P
5828	P5828L			fixation	2020-07-15	ORF1ab	NSP13	504	P
5828	P5828L			fixation	2020-07-01	ORF1ab	NSP13	504	P
5828	P5828L			fixation	2020-06-01	ORF1ab	NSP13	504	P
5828	P5828L			fixation	2020-06-15	ORF1ab	NSP13	504	P
5828		P5828S, P5828H, P5828L		parallel	2021-03-01	ORF1ab	NSP13	504	P
5828	P5828L			fixation	2020-09-01	ORF1ab	NSP13	504	P
5828	P5828L			fixation	2020-07-31	ORF1ab	NSP13	504	P
5828	P5828L			fixation	2020-11-02	ORF1ab	NSP13	504	P
5829		A5829V		parallel	2020-12-15	ORF1ab	NSP13	505	A
5865	Y5865C			fixation	2020-08-14	ORF1ab	NSP13	541	Y
5865	Y5865C			fixation	2020-06-01	ORF1ab	NSP13	541	Y
5865	Y5865C			fixation	2020-07-15	ORF1ab	NSP13	541	Y
5865	Y5865C			fixation	2020-06-15	ORF1ab	NSP13	541	Y
5865	Y5865C			fixation	2020-11-02	ORF1ab	NSP13	541	Y
5865	Y5865C			fixation	2020-07-31	ORF1ab	NSP13	541	Y
5865	Y5865C			fixation	2020-10-15	ORF1ab	NSP13	541	Y
5865	Y5865C			fixation	2020-09-01	ORF1ab	NSP13	541	Y
5865	Y5865C			fixation	2020-07-01	ORF1ab	NSP13	541	Y
5912		T5912I		parallel	2021-06-15	ORF1ab	NSP13	588	T
5912		T5912I, T5912A		parallel	2021-06-02	ORF1ab	NSP13	588	T
5912		T5912I		parallel	2021-01-01	ORF1ab	NSP13	588	T
5912		T5912I		parallel	2021-05-17	ORF1ab	NSP13	588	T
5912	T5912I	T5912I	T5912I	paraFix	2021-04-15	ORF1ab	NSP13	588	T
5912		T5912I		parallel	2021-03-01	ORF1ab	NSP13	588	T
5912		T5912I		parallel	2021-02-01	ORF1ab	NSP13	588	T
5912	T5912I	T5912I	T5912I	paraFix	2021-04-30	ORF1ab	NSP13	588	T
5912	T5912I	T5912I	T5912I	paraFix	2021-02-15	ORF1ab	NSP13	588	T
5912		T5912I		parallel	2021-03-16	ORF1ab	NSP13	588	T
5912		T5912I		parallel	2021-04-02	ORF1ab	NSP13	588	T
5912		T5912I		parallel	2021-01-15	ORF1ab	NSP13	588	T
5922		A5922V, A5922S		parallel	2020-11-16	ORF1ab	NSP13	598	A
5922		A5922V, A5922S		parallel	2020-12-15	ORF1ab	NSP13	598	A
5922	A5922S	A5922S, A5922V	A5922S	paraFix	2021-03-16	ORF1ab	NSP13	598	A
5922	A5922S			fixation	2021-04-02	ORF1ab	NSP13	598	A
5922	A5922S			fixation	2021-02-15	ORF1ab	NSP13	598	A
5922		A5922V, A5922S		parallel	2020-12-01	ORF1ab	NSP13	598	A
5922	A5922S			fixation	2021-04-30	ORF1ab	NSP13	598	A
5922	A5922S			fixation	2021-05-17	ORF1ab	NSP13	598	A
5922	A5922S			fixation	2021-02-01	ORF1ab	NSP13	598	A
5922	A5922S			fixation	2021-03-01	ORF1ab	NSP13	598	A
5922	A5922S	A5922V, A5922S	A5922S	paraFix	2021-01-15	ORF1ab	NSP13	598	A
5922	A5922S			fixation	2021-06-15	ORF1ab	NSP13	598	A
5922	A5922S	S5922A, A5922S, A5922V	A5922S	paraFix	2021-04-15	ORF1ab	NSP13	598	A
5922		A5922V, A5922S		parallel	2021-01-01	ORF1ab	NSP13	598	A
5923		T5923I		parallel	2021-01-15	ORF1ab	NSP13	599	T
5923		T5923I		parallel	2021-04-02	ORF1ab	NSP13	599	T
5941		T5941I		parallel	2021-02-01	ORF1ab	NSP14	16	T
5956	T5956I			fixation	2020-10-15	ORF1ab	NSP14	31	T
5956		T5956I		parallel	2021-06-02	ORF1ab	NSP14	31	T
5956		T5956I		parallel	2021-05-17	ORF1ab	NSP14	31	T
5968		P5968L, P5968S		parallel	2020-12-15	ORF1ab	NSP14	43	P
5971		P5971L		parallel	2021-06-15	ORF1ab	NSP14	46	P
5971		P5971L		parallel	2021-06-02	ORF1ab	NSP14	46	P
5971		P5971L		parallel	2021-05-17	ORF1ab	NSP14	46	P
5971		P5971L		parallel	2021-03-01	ORF1ab	NSP14	46	P
5971		P5971L		parallel	2021-07-01	ORF1ab	NSP14	46	P
5971	P5971L			fixation	2021-04-15	ORF1ab	NSP14	46	P
5974		M5974T, M5974I		parallel	2021-03-01	ORF1ab	NSP14	49	M
5997		M5997I		parallel	2021-07-01	ORF1ab	NSP14	72	M
5997		M5997I		parallel	2021-05-17	ORF1ab	NSP14	72	M
6010		A6010S		parallel	2021-03-16	ORF1ab	NSP14	85	A
6010		A6010S		parallel	2021-04-15	ORF1ab	NSP14	85	A
6010	A6010S			fixation	2021-03-01	ORF1ab	NSP14	85	A
6010		A6010S		parallel	2021-04-30	ORF1ab	NSP14	85	A
6010		A6010S		parallel	2021-04-02	ORF1ab	NSP14	85	A
6044		A6044V		parallel	2020-10-01	ORF1ab	NSP14	119	A
6044		A6044S, A6044V		parallel	2021-01-01	ORF1ab	NSP14	119	A
6054	N6054D			fixation	2021-01-15	ORF1ab	NSP14	129	N
6054	N6054D			fixation	2021-02-15	ORF1ab	NSP14	129	N
6054	N6054D			fixation	2021-04-30	ORF1ab	NSP14	129	N
6054	N6054D			fixation	2021-02-01	ORF1ab	NSP14	129	N
6054	N6054D			fixation	2020-12-01	ORF1ab	NSP14	129	N
6054	N6054D			fixation	2021-06-15	ORF1ab	NSP14	129	N
6054	N6054D			fixation	2021-04-15	ORF1ab	NSP14	129	N
6054	N6054D			fixation	2021-04-02	ORF1ab	NSP14	129	N
6054	N6054D			fixation	2021-03-01	ORF1ab	NSP14	129	N
6054	N6054D			fixation	2021-07-01	ORF1ab	NSP14	129	N
6054	N6054D			fixation	2020-11-16	ORF1ab	NSP14	129	N
6054	N6054D			fixation	2021-06-02	ORF1ab	NSP14	129	N
6054	N6054D			fixation	2021-03-16	ORF1ab	NSP14	129	N
6054	N6054D			fixation	2021-05-17	ORF1ab	NSP14	129	N
6054	N6054D			fixation	2021-01-01	ORF1ab	NSP14	129	N
6054	N6054D			fixation	2020-12-15	ORF1ab	NSP14	129	N
6092		V6092L		parallel	2021-02-01	ORF1ab	NSP14	167	V
6092		V6092L		parallel	2021-01-15	ORF1ab	NSP14	167	V
6092		V6092L		parallel	2021-01-01	ORF1ab	NSP14	167	V
6175		T6175I		parallel	2021-06-02	ORF1ab	NSP14	250	T
6175		T6175I		parallel	2020-12-01	ORF1ab	NSP14	250	T
6175		T6175I		parallel	2021-05-17	ORF1ab	NSP14	250	T
6222		P6222L, P6222S		parallel	2021-02-01	ORF1ab	NSP14	297	P
6241		V6241F		parallel	2020-12-01	ORF1ab	NSP14	316	V
6241		V6241F		parallel	2020-10-15	ORF1ab	NSP14	316	V
6245	A6245V			fixation	2020-08-14	ORF1ab	NSP14	320	A
6245	A6245V, V6245A			fixation	2020-10-01	ORF1ab	NSP14	320	A
6245	A6245V			fixation	2020-09-15	ORF1ab	NSP14	320	A
6245	A6245V			fixation	2020-07-31	ORF1ab	NSP14	320	A
6245	A6245V			fixation	2021-04-30	ORF1ab	NSP14	320	A
6245	A6245V			fixation	2021-02-15	ORF1ab	NSP14	320	A
6245	A6245V			fixation	2021-02-01	ORF1ab	NSP14	320	A
6245	A6245V			fixation	2020-09-01	ORF1ab	NSP14	320	A
6245	A6245V			fixation	2020-06-01	ORF1ab	NSP14	320	A
6245	A6245V, V6245A			fixation	2020-10-15	ORF1ab	NSP14	320	A
6249		D6249E, D6249N, D6249Y		parallel	2021-03-16	ORF1ab	NSP14	324	D
6252		P6252S, P6252L, P6252Q		parallel	2021-07-01	ORF1ab	NSP14	327	P
6252	P6252S			fixation	2020-11-16	ORF1ab	NSP14	327	P
6252		P6252Q, P6252S, P6252L		parallel	2021-06-02	ORF1ab	NSP14	327	P
6252	P6252S			fixation	2021-01-15	ORF1ab	NSP14	327	P
6252		P6252S, P6252L, P6252Q		parallel	2021-06-15	ORF1ab	NSP14	327	P
6272	E6272G			fixation	2021-06-15	ORF1ab	NSP14	347	E
6272		E6272G		parallel	2021-06-02	ORF1ab	NSP14	347	E
6274		K6274N		parallel	2020-12-15	ORF1ab	NSP14	349	K
6319	A6319V			fixation	2021-07-01	ORF1ab	NSP14	394	A
6319	A6319V			fixation	2021-06-15	ORF1ab	NSP14	394	A
6319	A6319V			fixation	2021-06-02	ORF1ab	NSP14	394	A
6376	P6376S			fixation	2021-06-15	ORF1ab	NSP14	451	P
6376	P6376S			fixation	2021-06-02	ORF1ab	NSP14	451	P
6376	P6376S			fixation	2021-04-30	ORF1ab	NSP14	451	P
6376	P6376S			fixation	2021-04-15	ORF1ab	NSP14	451	P
6376	P6376S			fixation	2021-07-01	ORF1ab	NSP14	451	P
6376	P6376S			fixation	2021-05-17	ORF1ab	NSP14	451	P
6378	E6378D			fixation	2021-04-15	ORF1ab	NSP14	453	E
6441	T6441I			fixation	2021-06-15	ORF1ab	NSP14	516	T
6485		T6485I		parallel	2021-06-02	ORF1ab	NSP15	33	T
6485		T6485I		parallel	2021-03-01	ORF1ab	NSP15	33	T
6485		T6485I		parallel	2020-12-15	ORF1ab	NSP15	33	T
6485	T6485I	T6485I	T6485I	paraFix	2021-01-15	ORF1ab	NSP15	33	T
6485	T6485I	T6485I	T6485I	paraFix	2020-11-16	ORF1ab	NSP15	33	T
6485		T6485I		parallel	2020-06-15	ORF1ab	NSP15	33	T
6485		T6485I		parallel	2021-02-01	ORF1ab	NSP15	33	T
6485	T6485I			fixation	2020-10-01	ORF1ab	NSP15	33	T
6485		T6485I		parallel	2021-01-01	ORF1ab	NSP15	33	T
6485		T6485I		parallel	2021-04-02	ORF1ab	NSP15	33	T
6485		T6485I		parallel	2021-03-16	ORF1ab	NSP15	33	T
6485		T6485I		parallel	2020-07-01	ORF1ab	NSP15	33	T
6485	T6485I			fixation	2020-07-31	ORF1ab	NSP15	33	T
6485		T6485I		parallel	2021-04-15	ORF1ab	NSP15	33	T
6485		T6485I		parallel	2021-02-15	ORF1ab	NSP15	33	T
6485		T6485I		parallel	2021-07-01	ORF1ab	NSP15	33	T
6485	T6485I			fixation	2020-09-15	ORF1ab	NSP15	33	T
6485		T6485I		parallel	2020-12-01	ORF1ab	NSP15	33	T
6485		T6485I		parallel	2021-04-30	ORF1ab	NSP15	33	T
6485	T6485I	T6485I	T6485I	paraFix	2020-09-01	ORF1ab	NSP15	33	T
6518		V6518L		parallel	2020-11-02	ORF1ab	NSP15	66	V
6579		V6579F		parallel	2021-03-01	ORF1ab	NSP15	127	V
6579		V6579F, V6579I		parallel	2021-02-01	ORF1ab	NSP15	127	V
6624	V6624L			fixation	2020-06-01	ORF1ab	NSP15	172	V
6657		P6657S, P6657L		parallel	2020-11-16	ORF1ab	NSP15	205	P
6657		P6657S, P6657L		parallel	2020-12-01	ORF1ab	NSP15	205	P
6657		P6657L, P6657S		parallel	2020-12-15	ORF1ab	NSP15	205	P
6657		P6657L, P6657S		parallel	2021-01-01	ORF1ab	NSP15	205	P
6658		R6658M, R6658S		parallel	2020-12-01	ORF1ab	NSP15	206	R
6670		M6670I, M6670T		parallel	2020-11-16	ORF1ab	NSP15	218	M
6670		M6670T, M6670I		parallel	2021-01-15	ORF1ab	NSP15	218	M
6670		M6670T, M6670I		parallel	2021-01-01	ORF1ab	NSP15	218	M
6670		M6670T, M6670I		parallel	2020-12-15	ORF1ab	NSP15	218	M
6683	A6683V			fixation	2020-11-16	ORF1ab	NSP15	231	A
6709	R6709C			fixation	2021-06-15	ORF1ab	NSP15	257	R
6711	K6711R, R6711K			fixation	2021-06-02	ORF1ab	NSP15	259	K
6711	K6711R	K6711R	K6711R	paraFix	2021-06-15	ORF1ab	NSP15	259	K
6714		P6714L, P6714S		parallel	2021-04-02	ORF1ab	NSP15	262	P
6714		P6714L, P6714S		parallel	2020-12-15	ORF1ab	NSP15	262	P
6722		P6722L, P6722H		parallel	2020-11-16	ORF1ab	NSP15	270	P
6772		V6772M, V6772L		parallel	2021-04-15	ORF1ab	NSP15	320	V
6772	V6772M			fixation	2021-06-15	ORF1ab	NSP15	320	V
6804	Q6804L			fixation	2020-10-15	ORF1ab	NSP16	6	Q
6804	Q6804L			fixation	2021-02-15	ORF1ab	NSP16	6	Q
6804	Q6804L			fixation	2020-09-15	ORF1ab	NSP16	6	Q
6804	Q6804L			fixation	2021-04-15	ORF1ab	NSP16	6	Q
6804	Q6804L			fixation	2021-01-15	ORF1ab	NSP16	6	Q
6804	Q6804L			fixation	2021-01-01	ORF1ab	NSP16	6	Q
6804	Q6804L			fixation	2020-09-01	ORF1ab	NSP16	6	Q
6804	Q6804L			fixation	2020-10-01	ORF1ab	NSP16	6	Q
6804	Q6804L			fixation	2021-06-15	ORF1ab	NSP16	6	Q
6832		A6832V		parallel	2021-01-01	ORF1ab	NSP16	34	A
6832		A6832V		parallel	2020-11-16	ORF1ab	NSP16	34	A
6832		A6832V		parallel	2020-12-01	ORF1ab	NSP16	34	A
6832		A6832V		parallel	2021-01-15	ORF1ab	NSP16	34	A
6832		A6832V		parallel	2020-12-15	ORF1ab	NSP16	34	A
6832		A6832V, A6832S		parallel	2021-03-01	ORF1ab	NSP16	34	A
6924		L6924F		parallel	2021-01-15	ORF1ab	NSP16	126	L
6938		T6938I		parallel	2021-04-30	ORF1ab	NSP16	140	T
6949		T6949I		parallel	2021-07-01	ORF1ab	NSP16	151	T
6949		T6949I		parallel	2021-04-30	ORF1ab	NSP16	151	T
6949		T6949I		parallel	2021-03-01	ORF1ab	NSP16	151	T
6949		T6949I		parallel	2021-04-15	ORF1ab	NSP16	151	T
6958		K6958R		parallel	2021-06-02	ORF1ab	NSP16	160	K
6958		K6958R		parallel	2021-04-15	ORF1ab	NSP16	160	K
6958		K6958R		parallel	2020-12-15	ORF1ab	NSP16	160	K
6958		K6958R		parallel	2021-01-15	ORF1ab	NSP16	160	K
6958		K6958R		parallel	2021-02-15	ORF1ab	NSP16	160	K
6958		K6958R		parallel	2021-05-17	ORF1ab	NSP16	160	K
6958		K6958R		parallel	2021-03-16	ORF1ab	NSP16	160	K
6958		K6958R		parallel	2021-03-01	ORF1ab	NSP16	160	K
6958		K6958R		parallel	2020-11-16	ORF1ab	NSP16	160	K
6993		T6993I		parallel	2021-02-15	ORF1ab	NSP16	195	T
6993		T6993I		parallel	2021-01-15	ORF1ab	NSP16	195	T
7014	R7014C			fixation	2020-11-16	ORF1ab	NSP16	216	R
7014	R7014C	C7014R, C7014N, R7014C, R7014N	R7014C	paraFix	2021-05-17	ORF1ab	NSP16	216	R
7014	R7014C			fixation	2020-12-01	ORF1ab	NSP16	216	R
7014	R7014C	C7014N, R7014H, R7014S, R7014C	R7014C	paraFix	2021-02-15	ORF1ab	NSP16	216	R
7014	R7014C	R7014H, R7014N, C7014N, C7014R, R7014C	R7014C	paraFix	2021-01-01	ORF1ab	NSP16	216	R
7014	R7014C	C7014R, R7014C, R7014H	R7014C	paraFix	2021-03-16	ORF1ab	NSP16	216	R
7014	R7014C			fixation	2021-04-15	ORF1ab	NSP16	216	R
7014	R7014C	R7014H, C7014N, R7014C	R7014C	paraFix	2021-02-01	ORF1ab	NSP16	216	R
7014	R7014C			fixation	2021-06-02	ORF1ab	NSP16	216	R
7014	R7014C	R7014H, C7014N, R7014C	R7014C	paraFix	2020-12-15	ORF1ab	NSP16	216	R
7014	R7014C	R7014H, C7014R, R7014C, C7014N, C7014S	R7014C	paraFix	2021-03-01	ORF1ab	NSP16	216	R
7014	R7014C	R7014H, R7014C, C7014R, C7014N, R7014N	R7014C	paraFix	2021-01-15	ORF1ab	NSP16	216	R
7014	R7014C	R7014N, R7014C, C7014N	R7014C	paraFix	2021-04-30	ORF1ab	NSP16	216	R
7014	R7014C	R7014H, R7014N, R7014C	R7014C	paraFix	2021-07-01	ORF1ab	NSP16	216	R
7014	R7014C	C7014N, R7014H, C7014R, R7014C, R7014N	R7014C	paraFix	2021-04-02	ORF1ab	NSP16	216	R
7014	R7014C	R7014H, R7014N, C7014R, C7014N, R7014C	R7014C	paraFix	2021-06-15	ORF1ab	NSP16	216	R
7034		P7034L, P7034S		parallel	2021-04-15	ORF1ab	NSP16	236	P
7034		P7034S, P7034L		parallel	2021-04-02	ORF1ab	NSP16	236	P
7034	P7034S	P7034S, P7034L	P7034S	paraFix	2021-01-15	ORF1ab	NSP16	236	P
7034		P7034S, P7034L		parallel	2021-03-16	ORF1ab	NSP16	236	P
7034		P7034S, P7034L		parallel	2021-07-01	ORF1ab	NSP16	236	P
7034		P7034S, P7034L		parallel	2021-01-01	ORF1ab	NSP16	236	P
7034		P7034S, P7034L		parallel	2021-04-30	ORF1ab	NSP16	236	P
7034	P7034S	P7034L, S7034P, P7034S	P7034S	paraFix	2021-03-01	ORF1ab	NSP16	236	P
7034		P7034L, P7034S		parallel	2021-02-01	ORF1ab	NSP16	236	P
7034		P7034S, P7034L		parallel	2021-06-02	ORF1ab	NSP16	236	P
7034	P7034S	P7034L, P7034S	P7034S	paraFix	2021-02-15	ORF1ab	NSP16	236	P
7068		M7068I		parallel	2020-12-15	ORF1ab	NSP16	270	M
7068		M7068I		parallel	2021-03-01	ORF1ab	NSP16	270	M
7068		M7068I		parallel	2020-12-01	ORF1ab	NSP16	270	M
7068		M7068I		parallel	2021-02-01	ORF1ab	NSP16	270	M
7068		M7068I		parallel	2021-01-15	ORF1ab	NSP16	270	M
7085		R7085I, R7085Q		parallel	2021-02-01	ORF1ab	NSP16	287	R
7096		N7096L		parallel	2020-12-01	ORF1ab	NSP16	298	N
7102		L7102I, L7102F, L7102Y		parallel	2020-11-16	Spike	Spike	5	L
7102		L7102F, L7102Y		parallel	2021-01-15	Spike	Spike	5	L
7102	L7102F	L7102F	L7102F	paraFix	2021-05-17	Spike	Spike	5	L
7102		L7102F		parallel	2020-07-01	Spike	Spike	5	L
7102		L7102F, L7102I		parallel	2021-02-01	Spike	Spike	5	L
7102	L7102F	L7102F	L7102F	paraFix	2021-06-15	Spike	Spike	5	L
7102		L7102F		parallel	2021-04-15	Spike	Spike	5	L
7102		L7102F, L7102I		parallel	2020-12-15	Spike	Spike	5	L
7102		L7102F		parallel	2021-04-30	Spike	Spike	5	L
7102		L7102F, L7102I		parallel	2020-11-02	Spike	Spike	5	L
7102		L7102F, L7102Y		parallel	2021-01-01	Spike	Spike	5	L
7102		L7102F		parallel	2020-12-01	Spike	Spike	5	L
7102	L7102F	L7102F, L7102H	L7102F	paraFix	2021-06-02	Spike	Spike	5	L
7102		L7102F		parallel	2021-02-15	Spike	Spike	5	L
7102		L7102F		parallel	2021-03-16	Spike	Spike	5	L
7102		L7102F		parallel	2021-07-01	Spike	Spike	5	L
7102		L7102F		parallel	2020-07-31	Spike	Spike	5	L
7102		L7102F		parallel	2020-07-15	Spike	Spike	5	L
7102		L7102F		parallel	2021-03-01	Spike	Spike	5	L
7102		L7102F		parallel	2021-04-02	Spike	Spike	5	L
7103		V7103F, V7103A		parallel	2021-06-15	Spike	Spike	6	V
7109		S7109F		parallel	2021-03-01	Spike	Spike	12	S
7109	S7109F	S7109F, F7109S	S7109F	paraFix	2020-11-16	Spike	Spike	12	S
7109		S7109F		parallel	2021-06-15	Spike	Spike	12	S
7109		S7109F		parallel	2021-02-01	Spike	Spike	12	S
7109		S7109F		parallel	2021-05-17	Spike	Spike	12	S
7109		S7109F		parallel	2021-03-16	Spike	Spike	12	S
7109		S7109F		parallel	2021-07-01	Spike	Spike	12	S
7109		S7109F		parallel	2021-02-15	Spike	Spike	12	S
7109		S7109F		parallel	2021-04-15	Spike	Spike	12	S
7109		S7109F		parallel	2021-06-02	Spike	Spike	12	S
7110	S7110I			fixation	2021-04-30	Spike	Spike	13	S
7110	S7110I			fixation	2021-02-15	Spike	Spike	13	S
7110	S7110I			fixation	2021-04-15	Spike	Spike	13	S
7110	S7110I			fixation	2021-06-15	Spike	Spike	13	S
7115		L7115F		parallel	2021-01-01	Spike	Spike	18	L
7115	L7115F	L7115F	L7115F	paraFix	2021-02-15	Spike	Spike	18	L
7115	L7115F	L7115R, L7115F	L7115F	paraFix	2021-07-01	Spike	Spike	18	L
7115	L7115F	L7115F, L7115R	L7115F	paraFix	2021-06-02	Spike	Spike	18	L
7115	L7115F	L7115F	L7115F	paraFix	2021-05-17	Spike	Spike	18	L
7115	L7115F	L7115F	L7115F	paraFix	2021-03-16	Spike	Spike	18	L
7115	L7115F	L7115F, F7115L	L7115F	paraFix	2021-04-15	Spike	Spike	18	L
7115	L7115F	L7115F, L7115R	L7115F	paraFix	2021-06-15	Spike	Spike	18	L
7115	L7115F	L7115F	L7115F	paraFix	2021-04-02	Spike	Spike	18	L
7115		L7115F		parallel	2021-01-15	Spike	Spike	18	L
7115		L7115F		parallel	2020-12-15	Spike	Spike	18	L
7115	L7115F	L7115F	L7115F	paraFix	2021-02-01	Spike	Spike	18	L
7115	L7115F	L7115F	L7115F	paraFix	2021-03-01	Spike	Spike	18	L
7115	L7115F	L7115F	L7115F	paraFix	2021-04-30	Spike	Spike	18	L
7116	T7116R			fixation	2021-06-15	Spike	Spike	19	T
7116	T7116R			fixation	2021-06-02	Spike	Spike	19	T
7116	T7116R			fixation	2021-05-17	Spike	Spike	19	T
7116	T7116R			fixation	2021-07-01	Spike	Spike	19	T
7117	T7117N	T7117I, T7117N	T7117N	paraFix	2021-03-01	Spike	Spike	20	T
7117	T7117N			fixation	2021-06-15	Spike	Spike	20	T
7117	T7117N	T7117I, T7117N	T7117N	paraFix	2021-04-30	Spike	Spike	20	T
7117	T7117N	T7117I, T7117N	T7117N	paraFix	2021-02-15	Spike	Spike	20	T
7117	T7117N			fixation	2021-06-02	Spike	Spike	20	T
7117	T7117N			fixation	2021-04-15	Spike	Spike	20	T
7117		T7117I, T7117N		parallel	2021-01-15	Spike	Spike	20	T
7117	T7117N	T7117I, T7117N, T7117A	T7117N	paraFix	2021-04-02	Spike	Spike	20	T
7117		T7117I, T7117N		parallel	2021-02-01	Spike	Spike	20	T
7117	T7117N			fixation	2021-07-01	Spike	Spike	20	T
7117	T7117N	T7117I, T7117N	T7117N	paraFix	2021-05-17	Spike	Spike	20	T
7123	P7123S	P7123S, P7123H	P7123S	paraFix	2021-06-02	Spike	Spike	26	P
7123		P7123S		parallel	2021-02-01	Spike	Spike	26	P
7123	P7123S	P7123S, P7123L	P7123S	paraFix	2021-04-30	Spike	Spike	26	P
7123	P7123S	P7123L, P7123H, P7123S	P7123S	paraFix	2021-05-17	Spike	Spike	26	P
7123	P7123S	P7123S	P7123S	paraFix	2021-03-01	Spike	Spike	26	P
7123	P7123S	P7123S	P7123S	paraFix	2021-07-01	Spike	Spike	26	P
7123		P7123S		parallel	2021-03-16	Spike	Spike	26	P
7123	P7123S	P7123S, P7123L	P7123S	paraFix	2021-06-15	Spike	Spike	26	P
7123	P7123S	P7123S	P7123S	paraFix	2021-04-15	Spike	Spike	26	P
7123	P7123S	P7123S	P7123S	paraFix	2021-02-15	Spike	Spike	26	P
7123	P7123S	P7123S	P7123S	paraFix	2021-04-02	Spike	Spike	26	P
7123		P7123S, P7123H, P7123L, P7123Y		parallel	2021-01-15	Spike	Spike	26	P
7124		A7124S		parallel	2021-02-01	Spike	Spike	27	A
7124	A7124S			fixation	2021-06-15	Spike	Spike	27	A
7132	G7132V			fixation	2020-12-01	Spike	Spike	35	G
7132	G7132V			fixation	2020-12-15	Spike	Spike	35	G
7132	G7132V			fixation	2020-11-16	Spike	Spike	35	G
7146		H7146Y		parallel	2020-10-01	Spike	Spike	49	H
7146		H7146Y		parallel	2020-08-14	Spike	Spike	49	H
7146		H7146Y		parallel	2020-12-15	Spike	Spike	49	H
7146		H7146Y		parallel	2020-07-01	Spike	Spike	49	H
7146		H7146Y		parallel	2020-07-15	Spike	Spike	49	H
7146		H7146Y		parallel	2021-04-30	Spike	Spike	49	H
7146		H7146Y		parallel	2020-06-01	Spike	Spike	49	H
7146		H7146Y		parallel	2020-06-15	Spike	Spike	49	H
7146		H7146Y		parallel	2021-03-16	Spike	Spike	49	H
7149	Q7149R			fixation	2021-06-02	Spike	Spike	52	Q
7149	Q7149R			fixation	2021-05-17	Spike	Spike	52	Q
7149	Q7149R			fixation	2021-04-15	Spike	Spike	52	Q
7149	Q7149R			fixation	2021-07-01	Spike	Spike	52	Q
7149	Q7149R			fixation	2021-06-15	Spike	Spike	52	Q
7151		L7151F		parallel	2021-03-16	Spike	Spike	54	L
7151		L7151F		parallel	2021-01-15	Spike	Spike	54	L
7151		L7151F		parallel	2020-07-01	Spike	Spike	54	L
7151		L7151F		parallel	2020-12-15	Spike	Spike	54	L
7164	A7164V	A7164V, V7164A	A7164V	paraFix	2021-07-01	Spike	Spike	67	A
7164	A7164V	A7164V	A7164V	paraFix	2021-06-15	Spike	Spike	67	A
7164		A7164V, A7164S		parallel	2021-04-02	Spike	Spike	67	A
7164	A7164V	A7164V	A7164V	paraFix	2021-06-02	Spike	Spike	67	A
7164		A7164S, A7164V		parallel	2021-03-01	Spike	Spike	67	A
7164		A7164V		parallel	2021-04-30	Spike	Spike	67	A
7164	A7164V			fixation	2021-04-15	Spike	Spike	67	A
7164	A7164V	A7164V, V7164A, A7164S	A7164V	paraFix	2021-05-17	Spike	Spike	67	A
7172		G7172V, G7172S		parallel	2021-07-01	Spike	Spike	75	G
7172		G7172V, G7172R		parallel	2021-01-15	Spike	Spike	75	G
7172		G7172V, G7172R		parallel	2021-04-30	Spike	Spike	75	G
7172		G7172V, G7172S, G7172R		parallel	2021-01-01	Spike	Spike	75	G
7172		G7172V, G7172R		parallel	2020-12-01	Spike	Spike	75	G
7172		G7172R, G7172V		parallel	2021-04-15	Spike	Spike	75	G
7172		G7172R, G7172V, G7172S		parallel	2021-03-01	Spike	Spike	75	G
7172		G7172R, G7172S, G7172V, G7172A		parallel	2021-04-02	Spike	Spike	75	G
7172		G7172V, G7172R		parallel	2020-11-16	Spike	Spike	75	G
7172		G7172R, G7172V		parallel	2021-03-16	Spike	Spike	75	G
7173	T7173I			fixation	2021-05-17	Spike	Spike	76	T
7173	T7173I			fixation	2021-06-15	Spike	Spike	76	T
7177	D7177A	D7177G, D7177A, D7177Y	D7177A	paraFix	2021-06-02	Spike	Spike	80	D
7177		D7177Y, D7177N, D7177A		parallel	2020-12-01	Spike	Spike	80	D
7177	D7177A			fixation	2021-04-15	Spike	Spike	80	D
7177	D7177A	D7177Y, D7177G, D7177A	D7177A	paraFix	2021-06-15	Spike	Spike	80	D
7177	D7177A	D7177Y, D7177A	D7177A	paraFix	2021-02-15	Spike	Spike	80	D
7177	D7177A	D7177N, D7177A, D7177Y	D7177A	paraFix	2021-01-01	Spike	Spike	80	D
7177	D7177A			fixation	2021-04-30	Spike	Spike	80	D
7177	D7177A			fixation	2021-02-01	Spike	Spike	80	D
7177	D7177A			fixation	2021-04-02	Spike	Spike	80	D
7177	D7177A	D7177Y, D7177A, D7177V	D7177A	paraFix	2020-12-15	Spike	Spike	80	D
7177	D7177A			fixation	2021-01-15	Spike	Spike	80	D
7177	D7177A	D7177Y, D7177A, D7177G, A7177D	D7177A	paraFix	2021-03-01	Spike	Spike	80	D
7177		D7177A, D7177Y, D7177V		parallel	2021-03-16	Spike	Spike	80	D
7177	D7177A	D7177G, D7177A, D7177N, D7177Y	D7177A	paraFix	2021-07-01	Spike	Spike	80	D
7177	D7177A	D7177Y, D7177A, D7177G, D7177N	D7177A	paraFix	2021-05-17	Spike	Spike	80	D
7192	T7192I	T7192I, T7192S	T7192I	paraFix	2021-06-15	Spike	Spike	95	T
7192		T7192I		parallel	2021-04-30	Spike	Spike	95	T
7192		T7192I		parallel	2021-03-16	Spike	Spike	95	T
7192	T7192I	T7192I, T7192A	T7192I	paraFix	2021-05-17	Spike	Spike	95	T
7192		T7192I		parallel	2021-04-15	Spike	Spike	95	T
7192	T7192I	T7192A, T7192I	T7192I	paraFix	2021-06-02	Spike	Spike	95	T
7192		T7192I		parallel	2021-07-01	Spike	Spike	95	T
7192		T7192I, T7192N		parallel	2021-04-02	Spike	Spike	95	T
7192		T7192I		parallel	2021-03-01	Spike	Spike	95	T
7192		T7192I		parallel	2020-11-16	Spike	Spike	95	T
7195	S7195F	S7195F	S7195F	paraFix	2020-12-01	Spike	Spike	98	S
7195	S7195F			fixation	2020-11-16	Spike	Spike	98	S
7195	S7195F			fixation	2021-02-15	Spike	Spike	98	S
7195	S7195F			fixation	2021-02-01	Spike	Spike	98	S
7195		S7195F		parallel	2021-04-15	Spike	Spike	98	S
7195	S7195F			fixation	2021-03-01	Spike	Spike	98	S
7195	S7195F			fixation	2021-01-15	Spike	Spike	98	S
7195	S7195F	S7195F	S7195F	paraFix	2021-04-30	Spike	Spike	98	S
7195		S7195F		parallel	2021-06-15	Spike	Spike	98	S
7195		S7195F		parallel	2021-04-02	Spike	Spike	98	S
7195		S7195F		parallel	2021-03-16	Spike	Spike	98	S
7195		S7195F		parallel	2021-07-01	Spike	Spike	98	S
7195		S7195F		parallel	2021-05-17	Spike	Spike	98	S
7195		S7195F		parallel	2021-06-02	Spike	Spike	98	S
7195	S7195F			fixation	2020-12-15	Spike	Spike	98	S
7199		R7199S, R7199I, R7199G		parallel	2021-03-01	Spike	Spike	102	R
7199		R7199S, R7199I		parallel	2021-03-16	Spike	Spike	102	R
7199		R7199S, R7199I		parallel	2021-02-15	Spike	Spike	102	R
7199		R7199S, R7199I		parallel	2021-04-30	Spike	Spike	102	R
7199		R7199S, R7199I		parallel	2021-06-02	Spike	Spike	102	R
7235	D7235Y	D7235Y, Y7235D, D7235H	D7235Y	paraFix	2021-07-01	Spike	Spike	138	D
7235	D7235Y	D7235Y, Y7235D, D7235H	D7235Y	paraFix	2021-06-15	Spike	Spike	138	D
7235	D7235Y	Y7235D, D7235Y, D7235H	D7235Y	paraFix	2021-06-02	Spike	Spike	138	D
7235	D7235Y	D7235Y, D7235H	D7235Y	paraFix	2021-04-30	Spike	Spike	138	D
7235		D7235H, D7235Y		parallel	2021-01-15	Spike	Spike	138	D
7235		D7235H, D7235Y		parallel	2021-01-01	Spike	Spike	138	D
7235	D7235Y	D7235Y, D7235H	D7235Y	paraFix	2021-02-15	Spike	Spike	138	D
7235	D7235Y	D7235Y, D7235H, D7235N	D7235Y	paraFix	2021-03-01	Spike	Spike	138	D
7235	D7235Y	Y7235D, D7235Y, D7235H, D7235N	D7235Y	paraFix	2021-05-17	Spike	Spike	138	D
7235	D7235Y	D7235Y, D7235H	D7235Y	paraFix	2021-04-02	Spike	Spike	138	D
7235		D7235Y, D7235H		parallel	2021-02-01	Spike	Spike	138	D
7235	D7235Y	D7235Y, D7235H	D7235Y	paraFix	2021-04-15	Spike	Spike	138	D
7235		D7235Y, D7235H		parallel	2021-03-16	Spike	Spike	138	D
7239		G7239D		parallel	2021-06-02	Spike	Spike	142	G
7239		G7239D		parallel	2021-07-01	Spike	Spike	142	G
7239		G7239D, G7239E		parallel	2021-06-15	Spike	Spike	142	G
7249		W7249C, W7249R		parallel	2021-03-01	Spike	Spike	152	W
7249		W7249L, W7249R, W7249C		parallel	2021-03-16	Spike	Spike	152	W
7249	W7249C	W7249C, W7249R, C7249W, W7249L	W7249C	paraFix	2021-06-15	Spike	Spike	152	W
7249	W7249C	W7249C, W7249R, W7249L	W7249C	paraFix	2021-04-30	Spike	Spike	152	W
7249		W7249C, W7249R, W7249L		parallel	2021-06-02	Spike	Spike	152	W
7249	W7249C	W7249L, W7249C	W7249C	paraFix	2021-04-15	Spike	Spike	152	W
7249		W7249R, W7249C		parallel	2021-02-01	Spike	Spike	152	W
7249		W7249R, W7249C		parallel	2021-01-15	Spike	Spike	152	W
7249	W7249C	W7249R, W7249C	W7249C	paraFix	2021-02-15	Spike	Spike	152	W
7249		W7249L, W7249R, W7249C		parallel	2021-04-02	Spike	Spike	152	W
7249		W7249R, W7249L, W7249F, W7249C		parallel	2021-05-17	Spike	Spike	152	W
7249		W7249R, W7249L, W7249C		parallel	2021-07-01	Spike	Spike	152	W
7250		M7250T, M7250I		parallel	2021-01-01	Spike	Spike	153	M
7250		M7250T, M7250I		parallel	2021-02-01	Spike	Spike	153	M
7250		M7250T, M7250I		parallel	2020-10-15	Spike	Spike	153	M
7250		M7250I, M7250T		parallel	2020-11-16	Spike	Spike	153	M
7250		M7250T, M7250I		parallel	2020-07-31	Spike	Spike	153	M
7250		M7250T, M7250I		parallel	2020-12-15	Spike	Spike	153	M
7250		M7250T, M7250I		parallel	2021-06-02	Spike	Spike	153	M
7250		M7250T, M7250I		parallel	2021-03-16	Spike	Spike	153	M
7250		M7250T, M7250I		parallel	2020-12-01	Spike	Spike	153	M
7250		M7250T		parallel	2021-03-01	Spike	Spike	153	M
7250		M7250T, M7250I		parallel	2021-04-30	Spike	Spike	153	M
7250		M7250T, M7250I		parallel	2021-05-17	Spike	Spike	153	M
7250		M7250T, M7250I		parallel	2021-07-01	Spike	Spike	153	M
7250		M7250I, M7250T		parallel	2021-01-15	Spike	Spike	153	M
7250		M7250T		parallel	2021-04-15	Spike	Spike	153	M
7250		M7250T		parallel	2021-02-15	Spike	Spike	153	M
7251		E7251A, E7251K		parallel	2021-06-02	Spike	Spike	154	E
7251	E7251K			fixation	2021-06-15	Spike	Spike	154	E
7253	E7253G			fixation	2021-06-02	Spike	Spike	156	E
7253	E7253G			fixation	2021-06-15	Spike	Spike	156	E
7253	E7253G	E7253G, G7253E	E7253G	paraFix	2021-07-01	Spike	Spike	156	E
7254	F7254L	F7254L, L7254F	F7254L	paraFix	2021-03-16	Spike	Spike	157	F
7254	F7254L			fixation	2021-02-15	Spike	Spike	157	F
7254	F7254L			fixation	2021-04-30	Spike	Spike	157	F
7254	F7254L	F7254S, F7254L	F7254L	paraFix	2021-06-15	Spike	Spike	157	F
7254	F7254L			fixation	2021-04-02	Spike	Spike	157	F
7254	F7254L			fixation	2021-04-15	Spike	Spike	157	F
7254		F7254L, F7254S		parallel	2021-06-02	Spike	Spike	157	F
7254	F7254L	F7254S, F7254L	F7254L	paraFix	2021-05-17	Spike	Spike	157	F
7254	F7254L			fixation	2021-03-01	Spike	Spike	157	F
7254		F7254L, F7254S		parallel	2021-07-01	Spike	Spike	157	F
7286	L7286F			fixation	2021-04-15	Spike	Spike	189	L
7287	R7287S			fixation	2021-04-02	Spike	Spike	190	R
7287	R7287S			fixation	2021-03-01	Spike	Spike	190	R
7287	R7287S			fixation	2021-06-02	Spike	Spike	190	R
7287	R7287S			fixation	2021-05-17	Spike	Spike	190	R
7287	R7287S			fixation	2021-02-15	Spike	Spike	190	R
7287	R7287S			fixation	2021-06-15	Spike	Spike	190	R
7287	R7287S			fixation	2021-07-01	Spike	Spike	190	R
7287	R7287S	R7287S	R7287S	paraFix	2021-04-15	Spike	Spike	190	R
7287	R7287S			fixation	2021-04-30	Spike	Spike	190	R
7312	D7312G			fixation	2021-04-30	Spike	Spike	215	D
7312	D7312G	D7312G, D7312Y, D7312H	D7312G	paraFix	2021-01-15	Spike	Spike	215	D
7312	D7312G			fixation	2021-06-02	Spike	Spike	215	D
7312	D7312G	G7312D, D7312H, D7312G	D7312G	paraFix	2021-04-02	Spike	Spike	215	D
7312	D7312G			fixation	2021-02-15	Spike	Spike	215	D
7312	D7312G			fixation	2021-05-17	Spike	Spike	215	D
7312	D7312G			fixation	2021-03-01	Spike	Spike	215	D
7312	D7312G			fixation	2021-02-01	Spike	Spike	215	D
7312	D7312G			fixation	2021-07-01	Spike	Spike	215	D
7312	D7312G	D7312H, D7312G, D7312Y, G7312D	D7312G	paraFix	2021-04-15	Spike	Spike	215	D
7312		D7312G, D7312Y, D7312H, D7312V		parallel	2020-12-15	Spike	Spike	215	D
7312	D7312G			fixation	2021-06-15	Spike	Spike	215	D
7312	D7312G			fixation	2021-01-01	Spike	Spike	215	D
7319	A7319V	A7319V	A7319V	paraFix	2021-06-02	Spike	Spike	222	A
7319	A7319V			fixation	2021-04-15	Spike	Spike	222	A
7319	A7319V			fixation	2020-10-15	Spike	Spike	222	A
7319	A7319V	A7319V, V7319A	A7319V	paraFix	2021-05-17	Spike	Spike	222	A
7319	A7319V	A7319V	A7319V	paraFix	2021-03-16	Spike	Spike	222	A
7319	A7319V	A7319V, A7319T	A7319V	paraFix	2021-01-15	Spike	Spike	222	A
7319	A7319V	V7319A, A7319V	A7319V	paraFix	2021-07-01	Spike	Spike	222	A
7319	A7319V	A7319V	A7319V	paraFix	2021-02-01	Spike	Spike	222	A
7319	A7319V	A7319V	A7319V	paraFix	2021-01-01	Spike	Spike	222	A
7319	A7319V, V7319A	A7319V, V7319L, V7319A	A7319V, V7319A	paraFix	2021-06-15	Spike	Spike	222	A
7319	A7319V	A7319V	A7319V	paraFix	2021-04-30	Spike	Spike	222	A
7319	A7319V	A7319V	A7319V	paraFix	2021-03-01	Spike	Spike	222	A
7319	A7319V	A7319V	A7319V	paraFix	2021-02-15	Spike	Spike	222	A
[truncated: 1,717 more rows]
